1 **Pheophorbide a, a chlorophyll catabolite may regulate jasmonate**  
2 **signalling during dark-induced senescence in *Arabidopsis***

3  
4 Sylvain Aubry<sup>a1</sup>, Niklaus Fankhauser<sup>b</sup>, Serguei Ovinnikov<sup>a</sup>, Krzysztof Zienkiewicz<sup>c,d</sup>,  
5 Ivo Feussner<sup>c,d,e</sup>, Stefan Hörtensteiner<sup>a1</sup>

6  
7 <sup>a</sup>Institute of Plant and Microbial Biology, University of Zürich, Zollikerstrasse 107,  
8 8008 Zürich, Switzerland

9 <sup>b</sup>Department for Clinical Research, Clinical Trials Unit, University of Bern,  
10 Finkenhubelweg 11, 3012 Bern, Switzerland

11 <sup>c</sup>Department of Plant Biochemistry, Albrecht-von-Haller-Institute for Plant Sciences,  
12 University of Göttingen, Justus-von-Liebig-Weg 11, 37077 Göttingen, Germany

13 <sup>d</sup>Göttingen Metabolomics and Lipidomics Laboratory, Göttingen Center for Molecular  
14 Biosciences (GZMB), University of Göttingen, Justus-von-Liebig-Weg 11, 37077  
15 Göttingen, Germany

16 <sup>e</sup>Department of Plant Biochemistry, Göttingen Center for Molecular Biosciences  
17 (GZMB), University of Göttingen, Justus-von-Liebig-Weg 11, 37077 Göttingen,  
18 Germany

19  
20 <sup>1</sup>corresponding authors

21  
22 **Summary:** Transcriptome and metabolite profiles of key chlorophyll breakdown  
23 mutants reveal complex interplay between speed of chlorophyll degradation and  
24 jasmonic acid signalling

25  
26 **List of author contributions**

27 S.A. and S.H. conceived the original research plans; S.A. and S.O. performed most  
28 of the experiments; K.Z. and I.F. analyzed jasmonic acid metabolites; S.A. and N.F.  
29 analyzed the data; S.A. and S.H. wrote the article with contribution of all the authors.

30  
31 **Financial sources**

32 This work was supported by the European Union (Plant Fellow program), the Swiss  
33 National Foundation/ERA-NET (grant N° 163504) and the German Research  
34 Foundation (DFG, grant N° INST 186/822-1).

35

36 **Corresponding authors**

37 Sylvain Aubry (sylvain.aubry@botinst.uzh.ch) and Stefan Hörtensteiner  
38 (shorten@botinst.uzh.ch)

39

40

41 **ABSTRACT**

42 Chlorophyll degradation is one of the most visible landmarks of leaf senescence.  
43 During senescence, chlorophyll is degraded in the multi-step pheophorbide *a*  
44 oxygenase (PAO)/phyllobilin pathway, which is tightly regulated at the transcriptional  
45 level. This regulation allows a coordinated and efficient remobilisation of nitrogen  
46 towards sink organs. Taking advantage of combined transcriptome and metabolite  
47 analyses during dark-induced senescence of *Arabidopsis thaliana* mutants deficient  
48 in key steps of the PAO/phyllobilin pathway, we show an unanticipated role for one of  
49 the pathway intermediates, *i.e.* pheophorbide *a*. Both jasmonic acid-related gene  
50 expression and jasmonic acid precursors specifically accumulated in *pao1*, deficient  
51 in PAO. We propose that pheophorbide *a*, the last intact porphyrin intermediate of  
52 chlorophyll degradation and unique pathway ‘bottleneck’, has been recruited as a  
53 signalling molecule of the chloroplast metabolic status. Our work challenges the  
54 assumption that chlorophyll breakdown is merely a senescence output, but propose  
55 that the flux of pheophorbide *a* through the pathway acts in a feed-forward loop that  
56 remodels the nuclear transcriptome and controls the pace of chlorophyll degradation  
57 in senescing leaves.

58

59

60 **INTRODUCTION**

61 In higher plants, leaf senescence is a tightly regulated process that is responsible for  
62 remobilisation of nutrients like nitrogen and phosphorus from source to sink organs  
63 (Hörtensteiner and Feller, 2002). Degradation of photosynthetic proteins,  
64 representing up to 70% of total leaf proteins, is co-regulated with chlorophyll (chl)  
65 degradation, while carotenoids are largely retained (Kusaba et al., 2009). Chl is  
66 degraded via a cascade of coordinated enzymes leading to cleavage and export of  
67 chl catabolites to the vacuole in the form of non-toxic linear tetrapyrroles, termed  
68 phyllobilins (Süssenbacher et al., 2014). Since all final phyllobilins are ultimately

69 derived from the porphyrin ring-opening activity of PHEOPHORBIDE A OXYGENASE  
70 (PAO), this pathway of chl breakdown is referred to as the “PAO/phyllobilin pathway”  
71 (Hörtensteiner, 2006).

72 Two key chlorophyll catabolic genes (CCGs) that encode the chlorophyll catabolic  
73 enzymes (CCEs) and precede the opening of the porphyrin ring of chl, *i.e.* the  
74 magnesium dechelating enzyme NON YELLOWING (NYE) and PHEOPHYTIN  
75 PHEOPHORBIDE HYDROLASE (PPH), hydrolyzing the phytol tail, are tightly co-  
76 regulated with PAO at the transcriptional level during leaf senescence. In addition, all  
77 three CCEs were shown to physically interact (Pružinská et al., 2007; Ren et al.,  
78 2007; Aubry et al., 2008; Sakuraba et al., 2012). This regulation may allow quick  
79 metabolic channelling of potentially phototoxic chl catabolites. A model based on the  
80 apparent coordinated expression of these genes and under the control of one or a  
81 few main transcriptional regulator(s) could therefore be hypothesised. However, the  
82 mechanism underlying this transcriptional coordination remains unclear.

83 Senescence is a complex process integrating hormonal and environmental signals  
84 from very distinct pathways (Kim et al., 2018). Only considering CCGs, at least three  
85 distinct hormonal signals and their respective signalling pathways have been shown  
86 to interact via some of their components with CCG promoters (for a recent review,  
87 see (Kuai et al., 2018))(Kuai *et al.*, 2017)(Kuai *et al.*, 2017). Jasmonic acid (JA),  
88 ethylene (ET) and abscisic acid (ABA) signalling pathways together with some  
89 components of the light signalling cascade have been shown to modulate CCG  
90 expression directly (Kuai et al., 2018).

91 In particular, JA and its derivatives are key regulators of senescence (He *et al.*, 2002)  
92 and typically synthesised in response to insects and necrotrophic pathogens (Kim et  
93 al., 2018; Wasternack and Feussner, 2018). Levels of JA increase during natural or  
94 dark-induced senescence (Breeze et al., 2011) and ectopic methyl jasmonic acid  
95 induces early senescence (Ueda and Kato, 1980). JA and associated oxylipin  
96 signalling have pleiotropic effects on the cellular fate, for example changing  
97 expression of defense genes (Hickman et al., 2017). Default JA signalling is  
98 perceived via CORONATINE-INSENSITIVE 1 (COI1) that in turn degrades the  
99 transcriptional repressors JA ZIM-domain proteins (JAZ) (Howe et al., 2018). For  
100 example, JAZ7 blocks MYC2 transcription factor activity that act upstream of many  
101 genes involved in dark-induced leaf senescence (Yu et al., 2016). MYC2/3/4 and  
102 their downstream targets NAC019/055/072 directly interact with NYE1, NYE2 and

103 NYC1 promoters (Zhu et al., 2015). In a very similar manner, NAC019 and MYC2  
104 interact with each other to synergistically up-regulate NYE1 (Zhu et al., 2015). Other  
105 transcription factors involved in ET signalling (EIN3, EEL, ORE1 and ERF17), ABA  
106 signalling (NAC016, NAC046, NAP, ABF2/3/4, ABI5) were also reported as direct  
107 interacting transcription factors of some *cis*-elements in CCG promoters (Kim et al.,  
108 2014; Sakuraba et al., 2014; Qiu et al., 2015; Sakuraba et al., 2016; Yin et al., 2016).  
109 These multiple intertwined hormonal cues eventually lead to chlorosis, by way of  
110 degradation of chl, as a visible landmark of dark-induced, aged-induced and also  
111 (a)biotic stress-induced senescence. Interestingly, constitutive overexpression of  
112 single CCGs in *Arabidopsis thaliana* (*Arabidopsis*) led in most cases to an  
113 acceleration of chl breakdown after senescence induction (Sakuraba et al., 2012).  
114 This suggests a feedback mechanism by which the chloroplast coordinates the rate  
115 of chl degradation during leaf senescence. The extent to which the speed of chl  
116 degradation itself could regulate the various hormonal cues and thereby inform cells  
117 about the current status of their senescing chloroplasts remains to be shown.  
118 Here, in an attempt to identify such a link and simultaneously shed more light onto  
119 these complex regulatory networks, we used genome-wide transcriptome analysis of  
120 CCG mutants during early dark-induced senescence. By combining these data with  
121 metabolite profiling, we aim at understanding processes that regulate the dynamics of  
122 the production of chl catabolites in the PAO/phyllobilin pathway and the extent to  
123 which accumulation of pathway intermediates remodel nuclear gene expression, and  
124 more precisely the JA response.

125 Based on our data, we propose a model where transient accumulation of the  
126 intermediate pheophorbide (pheide) acts as a sensor for the rate of chl  
127 degradation, and thereby regulates the speed of leaf senescence tuned by JA  
128 signalling. This model highlights a new function for the PAO/phyllobilin pathway of chl  
129 breakdown, not only as an irreversible prerequisite to senescence-driven nitrogen  
130 remobilization, but also as a sensing mechanism of the stress status of the  
131 chloroplast.

132

133

## 134 **RESULTS**

### 135 **Coordinated Variations of the Leaf Transcriptome During Dark-Induced** 136 **Senescence**

137 The extent of variations in gene expression during dark incubation of detached  
138 leaves (DET) was assessed using RNAseq. Mature leaves number six (see Materials  
139 and Methods) were sampled in triplicate at 0 and 2 days in the dark (dd). Using these  
140 time points allowed us to profile early events of the senescence program before any  
141 distinct visible phenotype (Fig. 1A).

142 In wild type (WT) leaf, a total of 21,403 genes were detected (genes with normalised  
143 counts  $\geq 1$  in at least one of the samples), amongst these 6,124 (29% of detected)  
144 genes were considered as being differentially expressed during DET (after applying  
145 EBSseq test using a posterior probability of differential expression  $\geq 0.95$  and a  
146 minimum fold change of two times). Of these, 3,389 genes were upregulated after  
147 dark treatment (Table 1). In an analogous experiment on Arabidopsis leaf  
148 senescence using microarrays, 2,153 genes were differentially expressed between 0  
149 and 2 dd, of which 65% (1,353) were common to our dataset (Supplemental Fig S1)  
150 (Van der Graaff et al., 2006). Another microarray-based analysis of the transcriptome  
151 during natural leaf senescence in Arabidopsis showed perturbation in 6,370 genes, of  
152 which 2,825 (44%) were common to our differentially expressed genes Supplemental  
153 Fig S1) (Breeze et al., 2011). These results show the biological relevance of our data.  
154 The differences observed being likely due to the biases associated with different  
155 techniques used to induce senescence. A relatively high number of genes have been  
156 shown to be similarly expressed when comparing different methods of senescence  
157 induction, such as DET, dark incubation of attached leaves and natural senescence  
158 (Van der Graaff et al., 2006). Analysis of the WT transcriptome signature using Gene  
159 Ontology (GO) terms revealed that photosynthesis, starch metabolism,  
160 glucosinolates, tetrapyrrole synthesis and redox terms were under-represented  
161 during DET (Fig. 2A), while terms gathering genes involved in lipid, amino acid and  
162 protein degradation but, more interestingly, also micro-RNA, retrotransposons and  
163 the bZIP family of transcription factors were over-represented during senescence  
164 (Fig. 2A). This is consistent with described major gene expression changes during  
165 leaf senescence (Van der Graaff et al., 2006; Breeze et al., 2011).

166

### 167 **Disruption of Specific CCGs Modifies Phyllobilin Accumulation that Lead to** 168 **Distinct Stay-Green Phenotypes**

169 In order to determine the extent to which the disruption of the PAO/phyllobilin  
170 pathway influences the global leaf senescence process, we analysed three mutants

171 that are defective in this pathway: *nye1-1*, *pph-1* and *pao1*, and analysed  
172 senescence of detached leaves after dark incubation (Pružinská et al., 2003; Ren et  
173 al., 2007; Schelbert et al., 2009). After 2 dd, chl was retained in these lines (Fig. 1A  
174 and B). Noteworthy, *pao1* contained slightly less chl before dark incubation (0 dd) in  
175 comparison to WT (Fig. 1B). In addition to chl retention, *pao1* accumulated pheide *a*  
176 during dark incubation and exhibited a light-independent cell death (LICD) phenotype  
177 (Pružinská et al., 2003; Hirashima et al., 2009), as deduced from an increase in  
178 electrolyte leakage of *pao1* leaf tissue in the dark (Fig. 1C). The molecular basis of  
179 LICD in this line is unclear, but this phenotype is specific to *pao1*, and may to some  
180 extent be linked to pheide *a* accumulation (Fig. 1D) (Hirashima et al., 2009). Absence  
181 of PAO in *pao1* led to a complete halt of the PAO/phyllobilin pathway with virtually no  
182 phyllobilin accumulation (Fig. 1D). By contrast, *nye1-1* and *pph-1* accumulated the  
183 major phyllobilins of Arabidopsis to about one third of the WT level after two days of  
184 dark treatment but virtually no pheide *a* (Fig. 1D) (Christ et al., 2013).  
185 Stopping the PAO/phyllobilin pathway artificially at various levels seems to imply  
186 largely distinct phenotypic modifications. On the top of its relatively well described  
187 implication on nitrogen remobilisation (mostly due to photosystem degradation), the  
188 control of chl catabolite homeostasis within the degradation pathway is a potentially  
189 overlooked signal that may inform the cell about the status of chloroplast integrity or  
190 metabolism.

191

## 192 **Transcriptome Analysis of CCG Mutants Gives Insight Into Molecular Bases of** 193 **Phenotypic Variations Observed in the Dark**

194 We then assessed alterations in the leaf transcriptome during DET in all three  
195 mutants. In *nye1-1* and *pph-1*, 6,227 and 6,764 genes were differentially expressed  
196 between 0 and 2 dd, respectively, numbers that were comparable to the changes  
197 observed in WT (Table 1). By contrast, about two times more genes (11,408) were  
198 differentially expressed in *pao1* during DET (Table 1). In order to detect variations in  
199 gene expression that were specific to mutations of one or several of the CCGs,  
200 genes differentially expressed during DET in every line were compared (Fig. 2B, C).  
201 2,692 and 3,524 genes, respectively, were specifically down- and up-regulated in  
202 *pao1*, while for *pph-1* (76 and 139 genes, respectively) and *nye1-1* (265 and 326  
203 genes, respectively) these numbers were much smaller (Fig. 2C). A core set of 3,203  
204 genes (1,912 up- and 1,291 down-regulated) showed similar patterns of expression

205 in all four lines. The most enriched genes among these were genes involved in  
206 catabolic processes, senescence, aging and autophagy, while genes involved in  
207 chloroplast and various photosynthesis-related processes were the most repressed  
208 ones (Supplemental Dataset 2). Analysis of GO term enrichment showed that altered  
209 genes showing a very similar pattern in all four lines included genes involved in  
210 photosynthesis, starch metabolism, glucosinolate synthesis (down-regulated) as well  
211 as protein and amino acid degradation (up-regulated) (Fig. 2A). Collectively, this  
212 indicated that mutations in any of the three CCGs, despite clear phenotypic  
213 differences in these lines, had little effect on general background senescence  
214 processes.

215 Most of the genes whose expression specifically changed in *pao1* while remaining  
216 unchanged in all other lines belonged to GO terms related to ethylene and WRKY  
217 and PHOR1 transcriptional regulators (Fig. 2A). Among GO terms that were  
218 significantly enriched in *pao1*, categories of genes involved in various stresses were  
219 the most enriched ones: these include response to stress, stimulus, chitin,  
220 carbohydrate, chemical stimuli as well as genes involved in post-transcriptional  
221 processes (Supplemental Dataset 2).

222 Thirty-six of the 50 most highly expressed genes after 2 dd were different between  
223 *pao1* and WT (Supplemental Dataset 3), among them, PLEIOTROPIC DRUG  
224 RESISTANCE 12 (PDR12/ABCG40), involved in ABA transport (Kang et al.,  
225 2010)(Kang *et al.*, 2010)(Kang *et al.*, 2010), LIPOXYGENASE 1 (LOX2) involved in  
226 JA synthesis (Wasternack and Feussner, 2018), as well as NYE1. Taken together  
227 our data suggest major remodelling of gene expression in *pao1* leaves upon dark  
228 incubation, while absence of NYE1 or PPH only mildly affect the senescence leaf  
229 transcriptome, at least at an early stage of senescence.

230

### 231 **The PAO/Phyllobilin Pathway Is Mainly Regulated at the Transcriptional Level**

232 Most of the core CCGs like *PAO*, *PPH* and *NYE1*, as well as genes encoding some  
233 catabolite-modifying enzymes, *i.e.* METHYLESTERASE 16 (MES16) and  
234 CYTOCHROME P450 MONOOXYGENASE 89A9 (CYP89A9) were transcriptionally  
235 up-regulated during DET in WT (Supplemental Dataset 1 and Fig. 3) (Sakuraba et al.,  
236 2012). In all four lines studied, genes encoding enzymes involved in the oxidative half  
237 of the chl cycle, namely CHLOROPHYLL A OXYGENASE (CAO) and  
238 CHLOROPHYLL SYNTHASE (CHLG), were down-regulated, whereas genes

239 involved in chl *b* to chl *a* conversion (*NYC1* and *NOL*) were up-regulated. This is  
240 consistent with the assumption that conversion of chl *b* to chl *a* is a prerequisite for  
241 chl degradation (Sakuraba et al., 2010). Noteworthy, expression of *RCCR* was  
242 repressed during DET and, thus, not correlated with the expression of *PAO* or of any  
243 of its proposed interacting partners (Fig. 3) (Sakuraba et al., 2012). Except for a slight  
244 decrease in *HCAR*, *nye1-1* and *pph-1* did not exhibit significant differences in CCG  
245 expression compared to WT. By contrast, major changes were observed in *pao1* with  
246 strong overexpression of *NYE1* and *NYC1* (but not *NOL*) and down-regulation of  
247 *CAO* and *HCAR*, suggesting a “feed-forward” regulation of the catabolic pathway.

248

### 249 **The PAO/Phyllobilin Pathway Is Controlled by Multiple Intertwined Signalling** 250 **Pathways**

251 In order to evaluate the impact of CCG mutations on upstream regulators of the  
252 pathway, we extracted expression data for signalling pathways involving JA, ET, ABA  
253 and light signalling in all four lines as described (Kuai et al., 2018) (Fig. 4). Out of the  
254 41 genes represented here that are key genes involved in these hormonal pathways,  
255 only *JAZ10* was significantly downregulated in *pao1* as compared to WT (none in  
256 *pph-1* or *nye1-1*, Supplemental Dataset 5), suggesting minor function of the hormonal  
257 cues before dark incubation. Expression of genes involved in ET and ABA signalling  
258 was mostly up-regulated in all lines during dark-induced senescence. The most  
259 striking difference between *pao1* and all other three lines was the pattern of  
260 expression of genes involved in JA signalling: *CO11* expression was increased  
261 significantly during dark treatment in WT, *pph-1* and *nye1-1*, but not in *pao1*, while  
262 nine of the twelve jasmonate-ZIM domain (JAZ) proteins showed an inverse pattern  
263 of expression. Intriguingly, among the very few genes differentially expressed after  
264 dark treatment in both *nye1-1* and *pph-1*, a subset of JAZ genes, namely *JAZ1*,  
265 *JAZ5*, *JAZ7*, *JAZ8* and *JAZ10*, were significantly down-regulated compared to WT  
266 (Supplemental Dataset 1).

267 It also appears that expression of transcription factors that are repressed by JAZ  
268 proteins like MYC2/3 and downstream factors like NAC019/055 and 072 were also  
269 up-regulated exclusively in *pao1* at 2 dd (Fig. 4).

270

### 271 **Accumulation of Pheide *a* in *pao1* Modifies JA-Related Signalling**



272 Having noticed strong variations of JA-related gene expression in *pao1* after dark  
273 incubation, we analysed whether JA synthesis and levels of JA metabolites were also  
274 modified in this line. To this end, JA precursors (12-OPDA, dn-OPDA, OPC6, and  
275 OPC4) as well as JA and some of its derivatives (JA-Val, JA-Ile, JA-Leu, 12OH-JA-  
276 Ile, 12COOH-JA-Ile, 12O-Glc-JA and 12HSO<sub>4</sub>-JA) were quantified in both WT and  
277 *pao1* (Fig. 5 and Supplemental Dataset 4). JA levels were significantly increased in  
278 WT during dark incubation, but in *pao1*, JA accumulated with an order of magnitude  
279 higher, *i.e.* up to 2 nmol g<sup>-1</sup> fresh weight (Fig. 5 and Supplemental Dataset 4). Levels  
280 of endogenous JA after dark treatment are known to increase in WT (Seltmann et al.,  
281 2010a) and are regulated under strong circadian control (Goodspeed et al., 2012).  
282 However, the dark-induced increase of JA in WT not necessarily triggers JA-  
283 signalling pathways (Seltmann et al., 2010b). In *pao1*, not only JA levels were  
284 dramatically increased, but also downstream metabolites, *i.e.* JA-Val, JA-Leu, 12OH-  
285 JA-Ile and the active phytohormone JA-Ile (Fig. 5 and Supplemental Dataset 4).  
286 Genes involved JA biosynthesis (*LOX2*, *AOC1*, *AOC2*, *OPR3*) and degradation  
287 (*CYP94B1*, *CYP94B3*) were also strongly upregulated in *pao1*. Interestingly,  
288 expression of *JMT* and *JAR1* were unchanged in both lines.  
289 Taken together, these data show a complex rewiring of the JA signalling pathway and  
290 indicate a link between the *pao1* phenotype and JA responses. Next, we tried to  
291 decipher the exact extend of this feedback using patterns of gene co-expression.

292

### 293 **Co-Expression Analysis Reveals Structure of Regulatory Networks of the** 294 **PAO/Phyllobilin Pathway**

295 To further characterise a possible link between the PAO/phyllobilin pathway and JA  
296 signalling, we computed the genome-wide expression data for all four lines studied  
297 and tried to decipher co-expression patterns underpinning relevant gene networks.  
298 The basic assumption being that genes that show a similar pattern of expression  
299 during DET and/or in various genetic backgrounds could be involved in a similar  
300 process and most probably share similar regulating pathways. We used Weighted  
301 Genome Co-expression Network Analysis (WGCNA) (Zhao et al., 2010) to perform  
302 comparative analysis of gene co-expressed modules among darkness treatment in all  
303 four lines. Genes were clustered in 16 co-expression modules, each harbouring  
304 genes that generally showed a similar pattern of expression across genetic  
305 background and treatment (Fig. 6A, Supplemental Fig. S2). Three modules (blue,

306 pink and yellow) were highly correlated with the darkness treatment. The pink and  
307 yellow modules contained genes that showed consistent changes expression during  
308 dark incubation in all four lines, but not the blue motif that did not correlate to *pao1*  
309 after 2 dd (Fig. 6B). Modules were subsequently characterised using GO term  
310 enrichment (Fig. 6B & Supplemental Dataset 6). All three motives were enriched in  
311 terms related to mRNA catabolic process, fatty acid catabolism, senescence and  
312 autophagy (Supplemental Dataset 6). Red, black and green modules that mostly  
313 correlated with *pao1* after dark incubation were enriched in terms representing  
314 various responses to stress as well as hormonal response (namely ET, JA and ABA  
315 responses, Supplemental Dataset 6). Interestingly, *PPH* is the hub gene. *i.e.* the  
316 most highly connected gene in this module (Langfelder and Horvath, 2008), of the  
317 blue module that contains most CCGs (*PAO*, *CYP89A9*, *PPH*, *NYE2*) (Fig. 6C). This  
318 module may gather conserved elements of the response to darkness. Finally,  
319 networks of genes neighbouring expression for CCGs and known transcriptional  
320 regulators of the PAO/phyllobilin pathway (as in Fig. 4) were extracted and their  
321 respective position in the networks visualised (Fig. 6C, for the sake of clarity, only the  
322 three most correlated genes are shown here). Surprisingly, not all CCGs were co-  
323 expressed in a unique cluster, and not necessarily with the predicted pathway, they  
324 were shown to interact with (Fig. 6C). For example, *MYC2/3/4* and *JAZ* genes were  
325 scattered across various modules, whereas genes involved in ethylene signalling  
326 (*EIN2*, *EIN3* and *ERF17*) were mostly grouped within the blue module. As shown  
327 before (Hickman et al., 2017), differences in the networks of JA-related genes may  
328 be explained by the interplay between several factors that are linked to the treatment  
329 and genotypes used here and that are thus represented in these data, *i.e.* dark  
330 treatment, pheid *a* and JA.

331 Validation of the clustering approach can be seen, for example, by the fact that  
332 *NAC019*, *NAC055* and *NAC072*, clustering closely together, have already been  
333 shown to be homologs (Zheng et al., 2012). Similarly, *ORE1* and *ANAC046* are  
334 closely related, but act in distinct clusters, suggesting a distinct regulation mechanism  
335 as shown recently (Park et al., 2018). The WGCNA approach can also be a fruitful  
336 approach to identify new candidates in the PAO/phyllobilin pathway, like for example  
337 phytanoyl CoA 2-hydrolase (*phyH*) that was suggested to be involved in phytol chain  
338 degradation (Araújo et al., 2011) and clustered within the yellow module with *MES16*  
339 and *NYC1*. Taken together, the co-expression data suggest that the PAO/phyllobilin

340 pathway is regulated by multiple layers of transcriptional factors. This approach may  
341 help deciphering multiple gene networks involved in the regulation of chl degradation  
342 that are tightly associated with developmental cues, nitrogen levels, and biotic and  
343 abiotic stresses. Further work is necessary to confirm the relative influence of each of  
344 these clusters.

345

346

## 347 **DISCUSSION**

348 We have shown that the PAO/phyllobilin pathway is mostly regulated at the  
349 transcriptional level during dark-induced senescence. A tight control of the  
350 expression of genes involved in this pathway is necessary to prevent possible  
351 oxidative damage due to a release of toxic tetrapyrrole breakdown intermediates. By  
352 genetically modulating the homeostasis of chl catabolites, we unravelled a retrograde  
353 signalling function for the PAO/phyllobilin pathway that uses JA-signalling to  
354 coordinate chloroplasts and the nucleus during dark-induced senescence.

355

### 356 **Pheide *a* Is a Key Signalling Molecule of Chloroplast Function**

357 The *pao1* mutant has originally been identified in a screen for lines that show  
358 abnormal response to pathogens by accelerated severe cell death (Greenberg and  
359 Ausubel, 1993). The basis of this light-dependent cell death phenotype is relatively  
360 well understood (Yang et al., 2004; Pružinská et al., 2005). Pheide *a* phototoxicity is  
361 even observable in mammalian systems (Jonker et al., 2002). However, another  
362 peculiar feature of *pao1* is a light-independent cell death phenotype, whose  
363 underlying molecular basis is still unclear (Hirashima et al., 2009) (Fig. 1C). Two  
364 hypotheses were proposed to explain cell death caused by pheide *a* accumulation in  
365 the dark: it may act directly on chloroplast membrane integrity (via lipid peroxidation  
366 or increased oxidative stress levels) or it may itself be a signalling molecule  
367 regulating cell death. The *acd2-2* mutant that is deficient in the next committed step  
368 of the PAO/phyllobilin pathway, *i.e.* red chlorophyll catabolite reductase (RCCR)  
369 accumulates red chlorophyll catabolite (RCC), a linear tetrapyrrole. Surprisingly,  
370 although RCC is phototoxic like pheide *a*, *acd2-2* is exclusively affected in a light-  
371 dependent manner (Supplemental Fig. S3) (Greenberg et al., 1994; Pružinská et al.,  
372 2007). The main difference is that pheide *a*, unlike RCC, is likely trapped within the  
373 chloroplast. Indeed, miss-targeting of the cytosolic phyllobilin-modifying enzyme

374 MES16 into the chloroplast in a *pao1* background revealed that *in vivo* pheide *a* is  
375 not a substrate for MES16. It can, therefore, be concluded that pheide *a* is unlikely to  
376 be released from the chloroplast (Christ et al., 2012), in contrast to RCC, which has  
377 been shown to (partially) localize to the vacuole (Pružinská et al., 2007).

378 Independent of the exact molecular basis underlying light-independent cell death in  
379 *pao1*, pheide *a* appears to have two specific properties: it is a metabolic “bottleneck”  
380 of degradation, *i.e.* once formed, chl molecules must be irreversibly degraded further,  
381 and it exhibits certain light-independent bioactive properties that act on chloroplast  
382 homeostasis. These two features render pheide *a* a very good candidate compound  
383 for sensing the rate at which chl is degraded, not only in the context of  
384 (natural/induced) senescence, but also during the pathogen-induced hypersensitive  
385 response (Mur et al., 2010). Sensing the rate at which chl is degraded is essential to  
386 coordinate various senescence processes such as nitrogen remobilisation  
387 (Hörtensteiner and Feller, 2002). Taking advantage of our large dataset, we propose  
388 a model of how pheide *a*-dependent signalling possibly works.

389

### 390 **Pheide *a* Metabolism Underpins a Specific Jasmonic Acid Response**

391 Absence of PAO during dark incubation and the concomitant accumulation of pheide  
392 *a* seem to be characterised by enhanced gene expression of most of the genes from  
393 JA synthesis and signalling pathways, as well as by an increase in JA and many of its  
394 derivatives. One common feature among the CCG mutant lines studied here is the  
395 variation of levels/flux of pheide *a*: lower amounts in *nye1-1/pph-1* (formation blocked  
396 by up-stream mutations) vs. higher amounts (further degradation blocked) in *pao1*.  
397 We propose a model, in which the quantity of pheide *a* that accumulates in/flows  
398 through the PAO/phyllobilin pathway at a defined time may act as a signal that  
399 triggers a specific JA response (Fig. 7).

400 Noteworthy, JA levels increase during dark-induced senescence in WT plants, but  
401 this is not necessarily followed by a coordinated JA response (Seltmann et al.,  
402 2010b). Prolonged darkness treatment is thought to induce degradation of  
403 chloroplast membranes and leads to an increase in lipid  $\beta$ -oxidation (Seltmann et al.,  
404 2010a). Breakdown of membrane lipids leads to a considerable increase in free  $\alpha$ -  
405 linolenic acid, a precursor of JA. However, in *pao1*, even if the extent remains  
406 unknown to which dark-dependent pheide *a* accumulation may damage chloroplast  
407 membranes, we could observe a massive increase of JA, way above the levels of

408 WT, and a change in most genes associated with the JA response. All these  
409 elements are strongly indicative of a fully coordinated and transduced JA response.  
410 This response is partially similar to JA responses observed during defense processes  
411 against insects, necrotrophic pathogens or ozone stress (Howe et al., 2018). It is  
412 important to note, however, that increase in *LOX* expression resulting in increased  
413 *LOX* activity might in itself be sufficient to increase lipid peroxidation and changes in  
414  $\alpha$ -linolenic acid availability and modulate oxidative stress that in turn would  
415 deteriorate chloroplast homeostasis (Wasternack, 2014; Mata-Perez et al., 2015;  
416 Wasternack and Feussner, 2018).

417 The pheide *a*-dependent JA response could also be differentiated across the CCG  
418 mutants studied here depending on their level of impairment in the pathway. Indeed,  
419 expression of several *JAZ* genes was reversed in *pao1* as compared to *nye1-1/pph-1*  
420 (Fig. 4). Simultaneous increase in *JAZ* expression and JA accumulation might be  
421 indicative of a heavy transduction load of the pathway (*i.e.* *JAZ* degradation by  
422 *SCF<sup>COI1</sup>*) making new synthesis of *JAZ* transcriptional inhibitors necessary.

423 The co-expression patterns of the JA signalling networks confirm that some of the JA  
424 signalling elements were co-expressed with various CCGs, but also illustrate the  
425 underlying complexity of the JA response (Fig. 6) (Hickman et al., 2017). For  
426 example, not all *MYC2* target genes are triggered in the same manner after pheide *a*  
427 accumulation: the defensin gene *PDF1.2* (At5g44420), a known marker of ET and JA  
428 (Lorrain et al., 2003), or *VSP1* (At5g24780), induced by wounding and JA, were not  
429 differentially expressed in any of the CCG mutants, whereas *PR4* (At3g04720), a  
430 pathogenesis-related gene, was significantly overexpressed during dark incubation in  
431 *pao1* exclusively. Further studies deciphering the various interacting sub-networks  
432 involved in the JA response upon developmental and various pathogenic cues will be  
433 needed to possibly explain these discrepancies.

434 Several independent pieces of evidence point towards an effect of chl degradation on  
435 JA signalling. For example, *NYE* mutants are less sensitive to pathogens and have a  
436 reduced JA response compared to WT (Mecey et al., 2011). Thus, preventing chl  
437 catabolites to be metabolised by the pathway by mutating *NYE* can apparently have  
438 some protective effect. Interestingly, *pxa1*, a mutant impaired in a peroxisomal ABC  
439 transporter essential for fatty acid degradation, accumulates  $\alpha$ -linolenic acid and  
440 pheide *a* during extended darkness (Kunz et al., 2009; Nyathi et al., 2010). This

441 further supports the idea of an intricate link between chloroplast membrane integrity,  
442 levels of pheide *a* and JA signalling.

443

#### 444 **Pheide *a* Signalling: Another Porphyrin-Based Retrograde Signal?**

445 Tetrapyrrole intermediates, like Mg-protoporphyrin IX or heme have been long  
446 suggested to be involved in plastid-to-nucleus retrograde signalling (Chi et al., 2013).  
447 Coordination of chloroplast function with nuclear genome expression is equally  
448 important during early developmental stages as during senescence. Interestingly,  
449 *hy1-101* (also referred to as *gun2*), a mutant deficient in HEME OXYGENASE 1  
450 (HO1) that catalyses heme degradation into biliverdin IX as a key step for  
451 phytochrome chromophore biosynthesis, constitutively accumulates high amounts of  
452 JA and high levels of JA-responsive genes (Zhai et al., 2007). Deficiency in HO1  
453 leads to the accumulation in the chloroplast of protoporphyrin IX, a circular porphyrin  
454 with a structure similar to pheide *a*. It remains to be shown, to which extent this  
455 phenotype is similar to the one observed in *pao1* and whether porphyrin-induced JA  
456 responses could be effectively coordinated signalling mechanisms, by which the  
457 status of the chloroplast can be further transduced to the nucleus during both  
458 synthesis and degradation of chl (Lin et al., 2016).

459

460

#### 461 **CONCLUSION**

462 Taken together, our data show that the homeostasis of chl derivatives in the  
463 PAO/phyllobilin pathway impacts leaf metabolism; specifically, the rate of  
464 accumulation of pheide *a* triggers JA-related responses that, to a certain extent,  
465 mimic pathogen responses. The JA-induced transcription factor MYC2 is involved in  
466 PAO/phyllobilin pathway activation by directly binding to the promoter of various  
467 CCG, like *PAO*, *NYC1* and *NYE1* (Zhu et al., 2015; Kuai et al., 2018). Here, we show  
468 a positive feedback loop mediated by pheide *a*, that in turn activates JA-responsive  
469 genes. While JA signalling is central to senescence regulation, this suggests an  
470 additional signalling function of the PAO/phyllobilin pathway besides default  
471 porphyrin detoxification.

472 Pheide *a* has likely been recruited during evolution as a signalling molecule of the  
473 chloroplast metabolic status, due to its particular position within the chl degradation  
474 pathway and because of its intricate chloroplast toxicity. Pheide *a* signalling may act

475 via accumulation of JA and its bioactive derivatives that in turn induce JA-dependent  
476 responses. However, the exact molecular mechanism, in particular the nature of the  
477 retrograde signal(s) that links chloroplast pheide  $\alpha$ -sensing to nuclear variation in  
478 gene expression remains to be identified. To the best of our knowledge, this report is  
479 the first to postulate retrograde signalling during leaf senescence. We show how  
480 critical the control of such signals is during late leaf development stages. This  
481 proposed mechanism allows a chloroplast-controlled remodelling of the nuclear  
482 transcriptome and aims at an efficient coordination of the cellular fate during  
483 senescence.

484

485

## 486 **MATERIALS AND METHODS**

### 487 **Plant Material**

488 WT and CCG mutant lines, *i.e.* the T-DNA lines *pao1* (Pružinská et al., 2005) and  
489 *pph-1* (Schelbert et al., 2009) and the EMS line *nye1-1* (Ren et al., 2007), were  
490 grown in short day condition (8 h light/16 h dark, 23°C, 65% humidity) for eight  
491 weeks. At least four leaves n°8 for each triplicates were harvested and frozen in  
492 liquid nitrogen at 0 days in the dark (dd) and after 2 days incubation on H<sub>2</sub>O-soaked  
493 filter paper in complete darkness at 23°C.

494

### 495 **RNA Isolation and Sequencing**

496 RNA was isolated using RNAeasy minikit (Qiagen) together with on-column DNase  
497 treatment. Quality was assessed using Bioanalyzer RNA nanochip (Agilent). Three  
498 replicates samples for each condition were multiplexed randomly on two lanes (12  
499 samples per lane) of HiSeq 2500 (Illumina).

500

### 501 **Read Processing and Gene Expression Analysis**

502 Single-end 100 bp reads were subjected to adapter trimming and removal of low  
503 quality bases in leading, trailing and sliding window (4 bp) mode with Trimmomatic  
504 v0.35 (Bolger et al., 2014). Reads shorter than 40 bp after trimming were discarded.  
505 Remaining reads were aligned to the protein-coding transcripts from the ENSEMBL  
506 release of the TAIR10 *Arabidopsis thaliana* transcriptome (Swarbreck et al., 2008)  
507 using Bowtie v1.0.1 (Langmead, 2010). Expression of genes and transcripts was  
508 quantified using RSEM v1.2.11 taking into account strand-specific information (Li and

509 Dewey, 2011). Differential expression was estimated using EBSeq by estimating the  
510 posterior probability of genes to be differentially expressed across all conditions  
511 (Leng et al., 2013). Coverage data were visualized using IGV viewer 2.3.34  
512 (Thorvaldsdottir et al., 2013) using RSEM-generated .bam files (see Supplemental  
513 Data). Gene ontology enrichment was performed using a corrected Benjamini-  
514 Hochberg enrichment score implemented in Pageman (Usadel et al., 2006).

515

### 516 **Co-Expression Network Analysis**

517 WGCNA was used to identify modules gathering genes showing similar pattern of  
518 expression across all conditions (Langfelder and Horvath, 2008). Genes below 50  
519 mean read count were excluded, leaving 14,691 genes in the analysis. An unsigned  
520 network was constructed from a signed topological overlap matrix and module  
521 detection was performed using the default deepSplit setting of 2. In order to visualize  
522 the direct subset of genes co-regulated with CCG and selected regulatory gene  
523 candidates, subnetworks were generated and visualized using VisANT 5.51 (Hu et  
524 al., 2007). In order to evaluate the extent to which expression of genes involved in  
525 the regulation of the PAO/phylobilin pathway (all present in Fig. 4) were linked to  
526 CCE genes, subnetworks containing either of these genes (CCGs and regulators)  
527 were extracted from the WGCNA networks and the three most connected genes for  
528 each gene were displayed (Fig. 6C). Larger nodes show the input genes and smaller  
529 nodes the top three connected genes for each input gene. Edges represent  
530 connection between the genes and node colors represent the modules in which the  
531 genes clustered.

532

### 533 **Chlorophyll Extraction**

534 Chl was extracted from liquid-nitrogen homogenised tissue using extraction buffer  
535 (90% cold acetone and 10% 0.2 M Tris-HCl, pH 8) (Guyer et al., 2014). Chl content  
536 was determined by photospectrometry at  $A_{649}$  and  $A_{665}$ . Chl concentrations were  
537 calculated as published (Strain *et al.*, 1971).

538

### 539 **Chlorophyll Catabolites Profiling**

540 Metabolite profiling was performed by liquid chromatography (LC)-tandem mass  
541 spectrometry (MS) (LC-MS/MS) according to a published protocol (Christ et al.,  
542 2016). Briefly, leaf samples from 5 replicates were harvested, frozen and



543 homogenized in liquid nitrogen. Metabolites were extracted in five volumes of ice-cold  
544 extraction buffer [80% methanol, 20% water, 0.1% formic acid (v/v/v)] and centrifuged  
545 (5 min at 14,000 rpm, 4°C). Supernatants were then analyzed by LC-MS/MS.

546 Samples were run on an Ultimate 3000 Rapid Separation LC system (Thermo Fisher  
547 Scientific) coupled to a Bruker Compact ESI-Q-TOF (Bruker Daltonics). The system  
548 consisted of a 150 mm C18 column (ACQUITY UPLC BEH, 1.7  $\mu\text{m}$ ; Waters Corp.,  
549 Milford, MA, USA). In order to efficiently separate phyllobilins, the following gradient  
550 of solvent B [acetonitrile with 0.1% (v/v) formic acid] in solvent A [water with 0.1%  
551 (v/v) formic acid] was run at a flow rate of 0.3 mL min<sup>-1</sup>: 5% B for 0.5 min, 5% B to  
552 100% B in 11.5 min, 100% B for 4 min, 100% B to 5% B in 1 min and 5% B for 1 min.  
553 Pheide *a* and phyllobilins were quantified from extracted ion chromatograms as  
554 relative peak areas using QuantAnalysis (Bruker Daltonics).

555

#### 556 **Determination of Phytohormones**

557 Extraction was performed as previously described for lipids (Matyash et al., 2008)  
558 with some modifications. Five replicates were used for each condition and each time  
559 point. Plant material (100 mg) was extracted with 0.75 mL of methanol containing 10  
560 ng D5-JA (C/D/N Isotopes Inc., Pointe-Claire, Canada), 30 ng D5-oPDA, 10 ng D4-  
561 JA-Leu (both kindly provided by Dr. Otto Miersch, Halle, Germany) as internal  
562 standards. After vortexing, 2.5 mL of methyl-tert-butyl ether (MTBE) were added and  
563 the extract was shaken for 1 h at room temperature. For phase separation, 0.6 mL  
564 H<sub>2</sub>O were added. The mixture was incubated for 10 min at room temperature and  
565 centrifuged at 450 g for 15 min. The upper phase was collected and the lower phase  
566 re-extracted with 0.7 mL methanol/water (3:2.5, v/v) and 1.3 mL MTBE as described  
567 above. The combined upper phases were dried under streaming nitrogen and re-  
568 suspended in 100  $\mu\text{L}$  of acetonitrile/water (1:4, v/v) containing 0.3 mM NH<sub>4</sub>COOH  
569 (adjusted to pH 3.5 with formic acid).

570 Reversed phase separation of constituents was achieved by LC using an ACQUITY  
571 UPLC system (Waters) equipped with an ACQUITY UPLC HSS T3 column (100 mm  
572 x 1 mm, 1.8  $\mu\text{m}$ ; Waters). Aliquots of 10  $\mu\text{L}$  were injected. Elution was adapted from  
573 a published procedure (Balcke et al., 2012). Solvent A and B were water and  
574 acetonitrile/water (9:1, v/v), respectively, both containing 0.3 mM NH<sub>4</sub>COOH  
575 (adjusted to pH 3.5 with formic acid). The flow rate was 0.16 mL min<sup>-1</sup> and the  
576 separation temperature held at 40°C. Elution was performed with two different binary

577 gradients. Elution profile 1 was as follows: 10% B for 0.5 min, to 40% B in 1.5 min,  
578 40% B for 2 min, to 95% B in 1 min, 95% B for 2.5 min; elution profile 2: 10% B for  
579 0.5 min, to 95% B in 5 min, 95% B for 2.5 min. In both elution profiles, the column  
580 was re-equilibrated in 10% B in 3 min.

581 Nano-electrospray ionization (nanoESI) analysis was achieved using a chip ion  
582 source (TriVersa Nanomate; Advion BioSciences, Ithaca, NY, USA). For stable  
583 nanoESI, 70  $\mu\text{L min}^{-1}$  of 2-propanol/acetonitrile/water (7:2:1, v/v/v) containing 0.3 mM  
584  $\text{NH}_4\text{COOH}$  (adjusted to pH 3.5 with formic acid) delivered by a Pharmacia 2248  
585 HPLC pump (GE Healthcare, Munich, Germany) were added just after the column via  
586 a mixing tee valve. By using another post column splitter, 502  $\text{nL min}^{-1}$  of the eluent  
587 were directed to the nanoESI chip with 5  $\mu\text{m}$  internal diameter nozzles. Jasmonates  
588 were ionized in negative mode at -1.7 kV (after UPLC separation with elution profile  
589 1) and in positive mode at 1.3 kV (after UPLC separation with elution profile 2),  
590 respectively, and determined in scheduled multiple reaction monitoring mode with an  
591 AB Sciex 4000 QTRAP tandem mass spectrometer (AB Sciex, Framingham, MA,  
592 USA). Mass transitions were as previously described (Iven *et al.*, 2012), with some  
593 modifications as follows: 214/62 [declustering potential (DP) 35 V, entrance potential  
594 (EP) 8.5 V, collision energy (CE) 24 V] for D5-JA, 209/59 (DP 30 V, EP 4.5 V, CE 24  
595 V) for JA, 237/165 (DP 45 V, EP 6 V, CE 24 V) for OPC4, 265/221 (DP 50 V, EP 6 V,  
596 CE 24 V) for OPC6, 305/97 (DP 30 V, EP 4 V, CE 32 V) for 12 $\text{HSO}_4$ -JA, 338/130 (DP  
597 45 V, EP 10 V, CE 30 V) for 12OH-JA-Ile, 352/130 (DP 45 V, EP 10 V, CE 30 V) for  
598 12COOH-JA-Ile, 387/59 (DP 85 V, EP 9 V, CE 52 V) for 12O-Glc-JA, 325/133 (DP 65  
599 V, EP 4 V, CE 30 V) for D4-JA-Leu, 308/116 (DP 45 V, EP 5 V, CE 28 V) for JA-Val,  
600 322/130 (DP 45 V, EP 5 V, CE 28 V) for JA-Ile, 296/170.2 (DP 65 V, EP 4 V, CE 28  
601 V) for D5-OPDA, 263/165 (DP 40 V, EP 5 V, CE 20 V) for dnOPDA and 291/165 (DP  
602 50 V, EP 5 V, CE 26 V) for 12-OPDA. The mass analyzers were adjusted to a  
603 resolution of 0.7 amu full width at half-height. The ion source temperature was 40°C,  
604 and the curtain gas was set at 10 (given in arbitrary units). Quantification was carried  
605 out using a calibration curve of intensity (m/z) ratios of [unlabeled]/[deuterium-  
606 labeled] vs. molar amounts of unlabeled (0.3-1000 pmol) compound. Due to the lack  
607 of standards, only relative amounts of 12 $\text{HSO}_4$ -JA, 12OH-JA-Ile, 12COOH-JA-Ile and  
608 12O-Glc-JA were determined.

609

## 610 **Ion Leakage Measurements**

611 For determining cell death in the lines during senescence, leaf discs (0.4 cm  
612 diameter) were punched with a cork-borer under green safe light, avoiding the mid  
613 vein. They were placed in a multi-well plate ion conductivity meter (Reid &  
614 Associates, South Africa) (1.5 mL H<sub>2</sub>O and two discs per well) and relative ion  
615 leakage (displayed as  $\mu$ S) was determined in the dark.

616

#### 617 **Accession Number**

618 The raw sequencing data from RNAseq are available in the ArrayExpress database  
619 ([www.ebi.ac.uk/arrayexpress](http://www.ebi.ac.uk/arrayexpress)) under accession number (E-MTAB-6965).

620

621

#### 622 **Supplemental Data**

623 The following supplemental materials are available.

624

625 **Supplemental Figure S1.** Overlap between the data presented here and two  
626 independent leaf senescence transcriptome datasets.

627

628 **Supplemental Figure S2.** Dendrogram of the modules generated by WGCNA

629

630 **Supplemental Figure S3.** Electrolyte leakage data of *pao1* and *acd2-2* mutants  
631 during dark-induced senescence.

632

633 **Supplemental Figure S4.** Mapping of the RNAseq reads to genes of interest in  
634 respective mutant lines.

635

636 **Supplemental Dataset S1.** RNAseq gene expression data during DET in the four  
637 lines.

638

639 **Supplemental Dataset S2.** GO terms enrichment for each pairwise comparison of  
640 gene expression.

641

642 **Supplemental Dataset S3.** List of 50 most highly expressed genes after dark  
643 incubation.

644

645 **Supplemental Dataset S4.** Data from quantification of jasmonic acid and its  
646 derivatives used to draw Fig. 5.

647

648 **Supplemental Dataset S5.** Expression of hormone-related genes in the four lines  
649 before senescence induction.

650

651 **Supplemental Dataset S6.** GO terms enrichment of all 16 clusters originating from  
652 the WGCNA analysis and WGCNA scoring matrix for dark-treated leaves across all  
653 lines and for *pao1* after 2 dd incubation.

654

655

## 656 **ACKNOWLEDGEMENTS**

657 We are thankful to Sirisha Aluri and Lennart Opitz from the Functional Genomics  
658 Centre Zürich for sequencing, to Otto Miersch from the University of Halle, Germany,  
659 for providing JA metabolite standards, and to Kathrin Salinger for technical  
660 assistance.

661

662

## 663 **LITERATURE CITED**

664 **Aubry S, Mani J, Hörtensteiner S** (2008) Stay-green protein, defective in Mendel's  
665 green cotyledon mutant, acts independent and upstream of pheophorbide a  
666 oxygenase in the chlorophyll catabolic pathway. *Plant Mol Biol* **67**: 243-256

667 **Balcke GU, Handrick V, Bergau N, Fichtner M, Henning A, Stellmach H, Tissier  
668 A, Hause B, Frolov A** (2012) An UPLC-MS/MS method for highly sensitive  
669 high-throughput analysis of phytohormones in plant tissues. *Plant Methods* **8**:  
670 47

671 **Bolger AM, Lohse M, Usadel B** (2014) Trimmomatic: a flexible trimmer for Illumina  
672 sequence data. *Bioinformatics* **30**: 2114-2120

673 **Breeze E, Harrison E, McHattie S, Hughes L, Hickman R, Hill C, Kiddle S, Kim  
674 YS, Penfold CA, Jenkins D, Zhang C, Morris K, Jenner C, Jackson S,  
675 Thomas B, Tabrett A, Legaie R, Moore JD, Wild DL, Ott S, Rand D,  
676 Beynon J, Denby K, Mead A, Buchanan-Wollaston V** (2011) High-  
677 resolution temporal profiling of transcripts during *Arabidopsis* leaf senescence

- 678 reveals a distinct chronology of processes and regulation. *Plant Cell* **23**: 873-  
679 894
- 680 **Chi W, Sun X, Zhang L** (2013) Intracellular signaling from plastid to nucleus. *Annu*  
681 *Rev Plant Biol* **64**: 559-582
- 682 **Christ B, Hauenstein M, Hörtensteiner S** (2016) A liquid chromatography-mass  
683 spectrometry platform for the analysis of phyllobilins, the major degradation  
684 products of chlorophyll in *Arabidopsis thaliana*. *Plant J* **88**: 505-518
- 685 **Christ B, Schelbert S, Aubry S, Süssenbacher I, Müller T, Kräutler B,**  
686 **Hörtensteiner S** (2012) MES16, a member of the methylesterase protein  
687 family, specifically demethylates fluorescent chlorophyll catabolites during  
688 chlorophyll breakdown in *Arabidopsis*. *Plant Physiol* **158**: 628-641
- 689 **Christ B, Süssenbacher I, Moser S, Bichsel N, Egert A, Müller T, Kräutler B,**  
690 **Hörtensteiner S** (2013) Cytochrome P450 CYP89A9 is involved in the  
691 formation of major chlorophyll catabolites during leaf senescence in  
692 *Arabidopsis*. *Plant Cell* **25**: 1868-1880
- 693 **Goodspeed D, Chehab EW, Min-Venditti A, Braam J, Covington MF** (2012)  
694 *Arabidopsis* synchronizes jasmonate-mediated defense with insect circadian  
695 behavior. *Proc Natl Acad Sci USA* **109**: 4674-4677
- 696 **Greenberg JT, Ausubel FM** (1993) *Arabidopsis* mutants compromised for the  
697 control of cellular damage during pathogenesis and aging. *Plant J* **4**: 327-341
- 698 **Greenberg JT, Guo A, Klessig DF, Ausubel FM** (1994) Programmed cell death in  
699 plants: a pathogen-triggered response activated coordinately with multiple  
700 defense functions. *Cell* **77**: 551-563
- 701 **Guyer L, Schelbert Hofstetter S, Christ B, Silverstre Lira B, Rossi M,**  
702 **Hörtensteiner S** (2014) Different mechanisms are responsible for chlorophyll  
703 dephytylation during fruit ripening and leaf senescence in tomato. *Plant*  
704 *Physiol* **166**: 44-56
- 705 **He YH, Fukushige H, Hildebrand DF, Gan SS** (2002) Evidence supporting a role of  
706 jasmonic acid in *Arabidopsis* leaf senescence. *Plant Physiol* **128**: 876-884
- 707 **Hickman R, Van Verk MC, Van Dijken AJH, Mendes MP, Vroegop-Vos IA, Caarls**  
708 **L, Steenbergen M, Van der Nagel I, Wesselink GJ, Jironkin A, Talbot A,**  
709 **Rhodes J, De Vries M, Schuurink RC, Denby K, Pieterse CMJ, Wees SCM**  
710 (2017) Architecture and dynamics of the jasmonic acid gene regulatory  
711 network. *Plant Cell* **29**: 2086-2105

- 712 **Hirashima M, Tanaka R, Tanaka A** (2009) Light-independent cell death induced by  
713 accumulation of pheophorbide *a* in *Arabidopsis thaliana*. *Plant Cell Physiol* **50**:  
714 719-729
- 715 **Hörtensteiner S** (2006) Chlorophyll degradation during senescence. *Annu Rev Plant*  
716 *Biol* **57**: 55-77
- 717 **Hörtensteiner S, Feller U** (2002) Nitrogen metabolism and remobilization during  
718 senescence. *J Exp Bot* **53**: 927-937
- 719 **Howe GA, Major IT, Koo AJ** (2018) Modularity in jasmonate signaling for multistress  
720 resilience. *Annu Rev Plant Biol* **69**: 387-415
- 721 **Hu Z, Ng DM, Yamada T, Chen C, Kawashima S, Mellor J, Linghu B, Kanehisa**  
722 **M, Stuart JM, DeLisi C** (2007) VisANT 3.0: new modules for pathway  
723 visualization, editing, prediction and construction. *Nucleic Acids Res* **35**:  
724 W625-632
- 725 **Jonker JW, Buitelaar M, Wagenaar E, van der Valk MA, Scheffer GL, Scheper**  
726 **RJ, Plösch T, Kuipers F, Oude Elferink RPJ, Rosing H, Beijnen JH,**  
727 **Schinkel AH** (2002) The breast cancer resistance protein protects against a  
728 major chlorophyll-derived dietary phototoxin and protoporphyria. *Proc Natl*  
729 *Acad Sci USA* **99**: 15649-15654
- 730 **Kang J, Hwang JU, Lee M, Kim YY, Assmann SM, Martinoia E, Lee Y** (2010)  
731 PDR-type ABC transporter mediates cellular uptake of the phytohormone  
732 abscisic acid. *Proc Natl Acad Sci USA* **107**: 2355-2360
- 733 **Kim HJ, Hong SH, Kim YW, Lee IH, Jun JH, Phee BK, Rupak T, Jeong H, Lee Y,**  
734 **Hong BS, Nam HG, Woo HR, Lim PO** (2014) Gene regulatory cascade of  
735 senescence-associated NAC transcription factors activated by ETHYLENE-  
736 INSENSITIVE2-mediated leaf senescence signalling in *Arabidopsis*. *J Exp Bot*  
737 **65**: 4023-4036
- 738 **Kim J, Kim JH, Lyu JI, Woo HR, Lim PO** (2018) New insights into the regulation of  
739 leaf senescence in *Arabidopsis*. *J Exp Bot* **69**: 787-799
- 740 **Kuai B, Chen J, Hörtensteiner S** (2018) The biochemistry and molecular biology of  
741 chlorophyll breakdown. *J Exp Bot* **69**: 751–767
- 742 **Kunz HH, Scharnewski M, Feussner K, Feussner I, Flügge UI, Fulda A, Gierth M**  
743 (2009) The ABC transporter PXA1 and peroxisomal  $\beta$ -oxidation are vital for  
744 metabolism in mature leaves of *Arabidopsis* during extended darkness. *Plant*  
745 *Cell* **21**: 2733-2749

- 746 **Kusaba M, Maoka T, Morita R, Takaichi S** (2009) A novel carotenoid derivative  
747 lutein 3-acetate, accumulates in senescent leaves of rice. *Plant Cell Physiol*  
748 **50**: 1573-1577
- 749 **Langfelder P, Horvath S** (2008) WGCNA: an R package for weighted correlation  
750 network analysis. *BMC Bioinformatics* **9**: 559
- 751 **Langmead B** (2010) Aligning short sequencing reads with Bowtie. *Curr Protoc*  
752 *Bioinformatics* **Chapter 11**: Unit 11.17
- 753 **Leng N, Dawson JA, Thomson JA, Ruotti V, Rissman AI, Smits BM, Haag JD,**  
754 **Gould MN, Stewart RM, Kendzierski C** (2013) EBSeq: an empirical Bayes  
755 hierarchical model for inference in RNA-seq experiments. *Bioinformatics* **29**:  
756 1035-1043
- 757 **Li B, Dewey CN** (2011) RSEM: accurate transcript quantification from RNA-Seq data  
758 with or without a reference genome. *BMC Bioinformatics* **12**: 323
- 759 **Lin Y-T, Chen L-J, Herrfurth C, Feussner I, Li H-M** (2016) Reduced biosynthesis of  
760 digalactosyldiacylglycerol, a major chloroplast membrane lipid, leads to  
761 oxylipin overproduction and phloem cap lignification in *Arabidopsis*. *Plant Cell*  
762 **28**: 219-232
- 763 **Lorrain S, Vailliau F, Balaqué C, Roby D** (2003) Lesion mimic mutants: keys for  
764 deciphering cell death and defense pathways in plants? *Trends Plant Sci* **8**:  
765 263-271
- 766 **Mata-Perez C, Sanchez-Calvo B, Begara-Morales JC, Luque F, Jimenez-Ruiz J,**  
767 **Padilla MN, Fierro-Risco J, Valderrama R, Fernandez-Ocana A, Corpas**  
768 **FJ, Barroso JB** (2015) Transcriptomic profiling of linolenic acid-responsive  
769 genes in ROS signaling from RNA-seq data in *Arabidopsis*. *Front Plant Sci* **6**:  
770 122
- 771 **Matyash V, Liebisch G, Kurzchalia TV, Shevchenko A, Schwudke D** (2008) Lipid  
772 extraction by methyl-tert-butyl ether for high-throughput lipidomics. *J Lipid Res*  
773 **49**: 1137-1146
- 774 **Mecey C, Hauck P, Trapp M, Pumplin N, Plovanich A, Yao J, He SY** (2011) A  
775 critical role of *STAYGREEN*/Mendel's *I* locus in controlling disease symptom  
776 development during *Pseudomonas syringae* pv *tomato* infection of  
777 *Arabidopsis*. *Plant Physiol* **157**: 1965-1974
- 778 **Mur LAJ, Aubry S, Mondhe M, Kingston-Smith A, Gallagher J, Timms-Taravella**  
779 **E, James C, Papp I, Hörtensteiner S, Thomas H, Ougham H** (2010)

- 780 Accumulation of chlorophyll catabolites photosensitizes the hypersensitive  
781 response elicited by *Pseudomonas syringae* in Arabidopsis. *New Phytol* **188**:  
782 161-174
- 783 **Nyathi Y, De Marcos Lousa C, van Roermund CW, Wanders RJ, Johnson B,**  
784 **Baldwin SA, Theodoulou FL, Baker A** (2010) The Arabidopsis peroxisomal  
785 ABC transporter, comatose, complements the *Saccharomyces cerevisiae*  
786 *pxa1 pxa2Δ* mutant for metabolism of long-chain fatty acids and exhibits fatty  
787 acyl-CoA-stimulated ATPase activity. *J Biol Chem* **285**: 29892-29902
- 788 **Pružinská A, Anders I, Aubry S, Schenk N, Tapernoux-Lüthi E, Müller T,**  
789 **Kräutler B, Hörtensteiner S** (2007) In vivo participation of red chlorophyll  
790 catabolite reductase in chlorophyll breakdown. *Plant Cell* **19**: 369-387
- 791 **Pružinská A, Anders I, Tanner G, Roca M, Hörtensteiner S** (2003) Chlorophyll  
792 breakdown: pheophorbide *a* oxygenase is a Rieske-type iron-sulfur protein,  
793 encoded by the *accelerated cell death 1* gene. *Proc Natl Acad Sci USA* **100**:  
794 15259-15264
- 795 **Pružinská A, Tanner G, Aubry S, Anders I, Moser S, Müller T, Ongania K-H,**  
796 **Kräutler B, Youn J-Y, Liljegren SJ, Hörtensteiner S** (2005) Chlorophyll  
797 breakdown in senescent Arabidopsis leaves: characterization of chlorophyll  
798 catabolites and of chlorophyll catabolic enzymes involved in the degreening  
799 reaction. *Plant Physiol* **139**: 52-63
- 800 **Qiu K, Li Z, Yang Z, Chen J, Wu S, Zhu X, Gao S, Gao J, Ren G, Kuai B, Zhou X**  
801 (2015) EIN3 and ORE1 accelerate degreening during ethylene-mediated leaf  
802 senescence by directly activating chlorophyll catabolic genes in Arabidopsis.  
803 *PLOS Genet* **11**: e1005399
- 804 **Ren G, An K, Liao Y, Zhou X, Cao Y, Zhao H, Ge X, Kuai B** (2007) Identification of  
805 a novel chloroplast protein AtNYE1 regulating chlorophyll degradation during  
806 leaf senescence in Arabidopsis. *Plant Physiol* **144**: 1429-1441
- 807 **Sakuraba Y, Han SH, Lee SH, Hörtensteiner S, Paek NC** (2016) *Arabidopsis*  
808 NAC016 promotes chlorophyll breakdown by directly upregulating  
809 *STAYGREEN1* transcription. *Plant Cell Rep* **35**: 155-166
- 810 **Sakuraba Y, Park SY, Kim YS, Wang SH, Yoo SC, Hörtensteiner S, Paek NC**  
811 (2014) Arabidopsis STAY-GREEN2 is a negative regulator of chlorophyll  
812 degradation during leaf senescence. *Mol Plant* **7**: 1288-1302



- 813 **Sakuraba Y, Schelbert S, Park S-Y, Han S-H, Lee B-D, Besagni Andrès C,**  
814 **Kessler F, Hörtensteiner S, Paek N-C** (2012) STAY-GREEN and chlorophyll  
815 catabolic enzymes interact at light-harvesting complex II for chlorophyll  
816 detoxification during leaf senescence in *Arabidopsis*. *Plant Cell* **24**: 507-518
- 817 **Sakuraba Y, Yokono M, Akimoto S, Tanaka R, Tanaka A** (2010) Deregulated  
818 chlorophyll *b* synthesis reduces the energy transfer rate between  
819 photosynthetic pigments and induces photodamage in *Arabidopsis thaliana*.  
820 *Plant Cell Physiol* **51**: 1055-1065
- 821 **Schelbert S, Aubry S, Burla B, Agne B, Kessler F, Krupinska K, Hörtensteiner S**  
822 (2009) Pheophytin pheophorbide hydrolase (pheophytinase) is involved in  
823 chlorophyll breakdown during leaf senescence in *Arabidopsis*. *Plant Cell* **21**:  
824 767-785
- 825 **Seltmann MA, Hussels W, Berger S** (2010a) Jasmonates during senescence:  
826 signals or products of metabolism? *Plant Signal Behav* **5**: 1493-1496
- 827 **Seltmann MA, Stingl NE, Lautenschlaeger JK, Krischke M, Mueller MJ, Berger S**  
828 (2010b) Differential impact of lipoxygenase 2 and jasmonates on natural and  
829 stress-induced senescence in *Arabidopsis*. *Plant Physiol* **152**: 1940-1950
- 830 **Süssenbacher I, Christ B, Hörtensteiner S, Kräutler B** (2014) Hydroxymethylated  
831 phyllobilins: A puzzling new feature of the dioxobilin branch of chlorophyll  
832 breakdown. *Chem-Eur J* **20**: 87-92
- 833 **Swarbreck D, Wilks C, Lamesch P, Berardini TZ, Garcia-Hernandez M, Foerster**  
834 **H, Li D, Meyer T, Muller R, Ploetz L, Radenbaugh A, Singh S, Swing V,**  
835 **Tissier C, Zhang P, Huala E** (2008) The *Arabidopsis* Information Resource  
836 (TAIR): gene structure and function annotation. *Nucleic Acids Res* **36**: D1009-  
837 1014
- 838 **Thorvaldsdottir H, Robinson JT, Mesirov JP** (2013) Integrative Genomics Viewer  
839 (IGV): high-performance genomics data visualization and exploration. *Brief*  
840 *Bioinform* **14**: 178-192
- 841 **Ueda J, Kato J** (1980) Isolation and identification of a senescence-promoting  
842 substance from wormwood (*Artemisia absinthium* L.). *Plant Physiol* **66**: 246-  
843 249
- 844 **Usadel B, Nagel A, Steinhauser D, Gibon Y, Blasing OE, Redestig H,**  
845 **Sreenivasulu N, Krall L, Hannah MA, Poree F, Fernie AR, Stitt M** (2006)

- 846 PageMan: an interactive ontology tool to generate, display, and annotate  
847 overview graphs for profiling experiments. *BMC Bioinformatics* **7**: 535
- 848 **Van der Graaff E, Schwacke R, Schneider A, Desimone M, Flügge UI, Kunze R**  
849 (2006) Transcription analysis of *Arabidopsis* membrane transporters and  
850 hormone pathways during developmental and induced leaf senescence. *Plant*  
851 *Physiol* **141**: 776-792
- 852 **Wasternack C** (2014) Action of jasmonates in plant stress responses and  
853 development--applied aspects. *Biotechnol Adv* **32**: 31-39
- 854 **Wasternack C, Feussner I** (2018) The oxylipin pathways: biochemistry and function.  
855 *Annu Rev Plant Biol* **69**: 363-386
- 856 **Yang M, Wardzala E, Johal GS, Gray J** (2004) The wound-inducible *Lls1* gene from  
857 maize is an orthologue of the *Arabidopsis Acd1* gene, and the LLS1 protein is  
858 present in non-photosynthetic tissues. *Plant Mol Biol* **54**: 175-191
- 859 **Yin XR, Xie XL, Xia XJ, Yu JQ, Ferguson IB, Giovannoni JJ, Chen KS** (2016)  
860 Involvement of an ethylene response factor in chlorophyll degradation during  
861 citrus fruit degreening. *Plant J* **86**: 403-412
- 862 **Yu J, Zhang Y, Di C, Zhang Q, Zhang K, Wang C, You Q, Yan H, Dai SY, Yuan**  
863 **JS, Xu W, Su Z** (2016) JAZ7 negatively regulates dark-induced leaf  
864 senescence in *Arabidopsis*. *J Exp Bot* **67**: 751-762
- 865 **Zhai Q, Li CB, Zheng W, Wu X, Zhao J, Zhou G, Jiang H, Sun J, Lou Y, Li C**  
866 (2007) Phytochrome chromophore deficiency leads to overproduction of  
867 jasmonic acid and elevated expression of jasmonate-responsive genes in  
868 *Arabidopsis*. *Plant Cell Physiol* **48**: 1061-1071
- 869 **Zhao W, Langfelder P, Fuller T, Dong J, Li A, Hovarth S** (2010) Weighted gene  
870 coexpression network analysis: state of the art. *J Biopharm Stat* **20**: 281-300
- 871 **Zheng XY, Spivey NW, Zeng W, Liu PP, Fu ZQ, Klessig DF, He SY, Dong X**  
872 (2012) Coronatine promotes *Pseudomonas syringae* virulence in plants by  
873 activating a signaling cascade that inhibits salicylic acid accumulation. *Cell*  
874 *Host Microbe* **11**: 587-596
- 875 **Zhu X, Chen J, Xie Z, Gao J, Ren G, Gao S, Zhou X, Kuai B** (2015) Jasmonic acid  
876 promotes degreening via MYC2/3/4- and ANAC019/055/072-mediated  
877 regulation of major chlorophyll catabolic genes. *Plant J* **84**: 597-610
- 878
- 879

880 **FIGURE LEGENDS**

881 **Figure 1. Phenotypic characterisation of CCGs mutants during dark-induced**  
882 **senescence of detached leaves.**

883 **A** WT, *pao1*, *nye1-1* and *pph-1* detached leaves before and after 2 and 5 days of  
884 dark induced senescence (dd). **B** Chlorophyll degradation of CCG mutants during  
885 dark-induced senescence. **C** Electrolyte leakage of CCG mutants during dark-  
886 induced senescence. **D** Profile of the accumulation of pheophorbide *a* and the major  
887 phyllobilin (DNCC\_618) in CCG mutants during dark-induced senescence. Data in **B**-  
888 **D** are mean values of a representative experiment with three (**B**), at least ten (**C**) and  
889 five (**D**) replicates, respectively. Error bars indicate SD.

890

891 **Figure 2. RNAseq profiling of CCG mutants provide new insight into the**  
892 **relationship of the PAO/phyllobilin pathway to global leaf senescence.**

893 **A** Major enriched gene ontology terms identified in the three CCG mutants during  
894 dark-induced senescence (0 dd vs 2 dd) using Wilcoxon test implemented in  
895 Pageman tool (Usadel et al., 2006). **B** Principal Component Analysis of the RNAseq  
896 data. **C** Venn diagrams showing common patterns of differential expression (0 dd vs  
897 2 dd) of up- and down-regulated genes during dark-induced senescence.

898

899 **Figure 3. Influence of dark-induced senescence on the expression of the genes**  
900 **involved in the PAO/phyllobilin pathway.**

901 Heat maps represent  $\log_2$  (fold change) of gene expression in each of the four  
902 studied lines during dark-induced senescence. Genes/enzymes: CAO, chlorophyll *a*  
903 oxygenase; CHLG, chlorophyll synthase; CYP89A9, cytochrome P450  
904 monooxygenase 89A9; HCAR, 7-hydroxymethyl chlorophyll *a* reductase; MES16,  
905 methylesterase 16; NYC1, non-yellow coloring 1 (chlorophyll *b* reductase); NYE1,  
906 non yellowing 1 (magnesium dechelataase); NYE2, non yellowing 2; PAO,  
907 pheophorbide *a* oxygenase; PPH, pheophytinase; RCCR, RCC reductase; TIC55,  
908 translocon at the inner chloroplast envelope 55. Phyllobilins: DNCC, dioxobilin-type  
909 NCC; NCC, non-fluorescent chlorophyll catabolite; *p*FCC, *primary* fluorescent  
910 chlorophyll catabolite; RCC, red chlorophyll catabolite.

911

912 **Figure 4. Transcriptional regulation of the PAO/phyllobilin pathway during**  
913 **dark-induced senescence is mainly affected in *pao1*.**

914 Heat maps represent  $\log_2$  (fold change) of gene expression in each of the four  
915 studied lines during dark-induced senescence. JA, jasmonic acid; ET, ethylene; ABA,  
916 abscisic acid; COI1, coronatine insensitive 1; JAZ, jasmonate-ZIM domain; NAC,  
917 NAM, ATAF1/2 and CUC2 domain protein; NAP, NAC-like, activated by PA3/PI; EIN,  
918 ethylene insensitive; ELF3, early flowering 3; PIF, phytochrome interacting factor;  
919 SOC1, suppressor of overexpression of *coi1*; ERF17, ethylene response factor;  
920 ORE1, oresara 1; EEL, enhance em level ; ABI5, ABA insensitive 5; ABF, ABA-  
921 responsive element binding factor; SnRK2, serine/threonine kinase 2; PYL9,  
922 pyrabactin resistance 1-like 9.

923

924 **Figure 5. Jasmonic acid metabolism during dark-induced senescence in WT**  
925 **and *pao1*.**

926 Levels of JA and JA-related metabolites in grey (0 dd) and black (2 dd) for WT and  
927 *pao1* are shown as histograms. Expression levels are shown using heat maps of  
928  $\log_2$ (fold change). Genes/enzymes: DAD1, delayed anther dehiscence 1; LOX2, 13-  
929 lipoxygenase 2; AOS, allene oxide synthase; AOC, allene oxide cyclase; OPR3,  
930 OPDA reductase 3; IAR3, IAA-alanine resistant 3; JMT, jasmonate  
931 methyltransferase; JAR1, JA-amino acid synthetase 1; JOX, JA-induced oxygenase;  
932 CYP, cytochrome P450 monooxygenase; ST2A, sulfotransferase 2. Metabolites:  
933 OPDA, 12-oxo-phytodienoic acid; OPC 3-oxo-2-cis-2-pentenyl cyclopentyl-octanoic  
934 acid; JA-CoA, jasmonate-coenzyme A. Asterisks indicate significant differences ( $p <$   
935 0.05).

936

937 **Figure 6. Weighted gene co-expression analysis (WGCNA) sheds new light on**  
938 **the regulation of the PAO/phyllobilin pathway.**

939 **A** Heat map showing a module-sample association matrix. Each row corresponds to  
940 a module. The heat map colour code from blue to red indicates the correlation  
941 coefficient between the module and either the treatment (first column; darkness) or  
942 the genetic background. **B** Patterns of expression (left panel) and size (right panel) of  
943 gene co-expression modules. On the left panel, heat maps indicate mean expression  
944 [ $\log_2$  (fold change)] of the 10% most representative genes (highest connectivity) for  
945 each WGCNA module during dark-induced senescence. **C** The regulatory network of  
946 the PAO/phyllobilin pathway as exported from WGCNA and visualized in VisANT  
947 5.51 (Hu et al., 2007). Larger nodes show the input genes (CCGs, transcriptional

948 regulators according to Fig. 4), smaller nodes were limited to the top 3 most  
949 connected genes for each input gene, the edges represent connections between the  
950 genes. Node colours represent the module in which the genes clustered during  
951 WGCNA analysis.

952

953 **Figure 7. Model illustrating the influence of pheophorbide a homeostasis on JA**  
954 **signalling.**

955 The middle panel shows the PAO/phyllobilin pathway under normal senescence  
956 conditions, leading to the complete degradation of chlorophyll to vacuole-localized  
957 phyllobilins. Left and right panels show modulation of catabolite homeostasis caused  
958 by mutations of either *nye1-1* or *pph1* (left panel) or *pao1* (right panel), and the  
959 respective observed downstream modulation of the JA response (hatched arrows).  
960 Arrow sizes schematically represent relative flux (metabolite) and response (JA  
961 signalling) intensities. Among the few genes differentially expressed in *nye1-1* and  
962 *pph-1*, JAZ genes were downregulated compared to WT. On the other hand, in *pao1*,  
963 JA biosynthesis and signalling genes as well as some JA bioactive derivatives were  
964 induced.

**Table 1. Number of genes differentially expressed during dark incubation of detached leaves (DET) in WT and three CCG mutant lines.**

25,920 genes were detected in at least one of the 24 samples.

| Total transcripts detected (non zero)                                      |        | 21,403       |                |
|----------------------------------------------------------------------------|--------|--------------|----------------|
| Differentially expressed during DET<br>(PPDE $\geq 0.95$ and FC $\geq 2$ ) | Total  | Up-regulated | Down-regulated |
| WT                                                                         | 6,124  | 3,389        | 2,735          |
| <i>nye1-1</i>                                                              | 6,227  | 3,325        | 2,902          |
| <i>pph-1</i>                                                               | 6,764  | 3,777        | 2,987          |
| <i>pao1</i>                                                                | 11,408 | 5,723        | 5,685          |

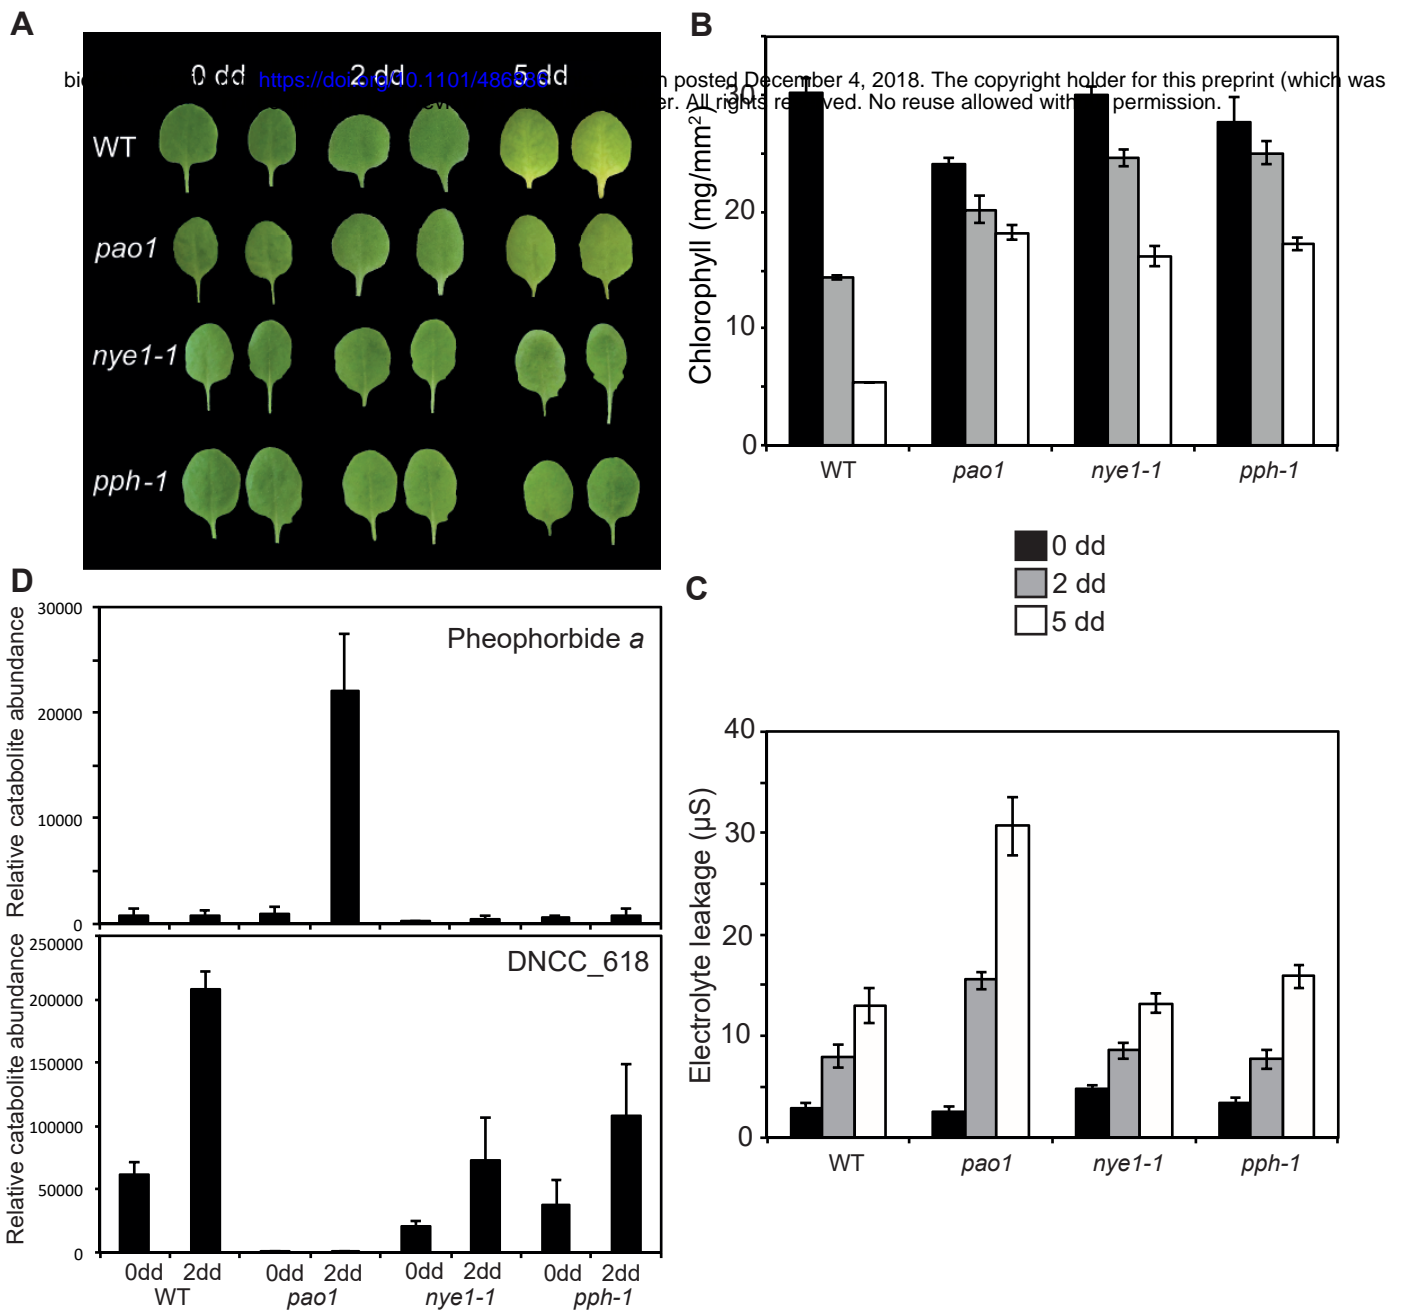

**Figure 1. Phenotypic characterisation of CCGs mutants during dark-induced senescence of detached leaves.** **A** WT, *pao1*, *nye1-1* and *pph-1* detached leaves before and after 2 and 5 days of dark induced senescence (dd). **B** Chlorophyll degradation of CCG mutants during dark-induced senescence. **C** Electrolyte leakage of CCG mutants during dark-induced senescence. **D** Profile of the accumulation of pheophorbide *a* and the major phyllobilin (DNCC\_618) in CCG mutants during dark-induced senescence. Data in **B-D** are mean values of a representative experiment with three (**B**), at least ten (**C**) and five (**D**) replicates, respectively. Error bars indicate SD.

**A**

0 dd vs 2 dd

bioRxiv preprint doi: <https://doi.org/10.1101/486886>; this version posted December 4, 2018. The copyright holder for this preprint (which was not certified by peer review) is the author/funder. All rights reserved. No reuse allowed without permission.

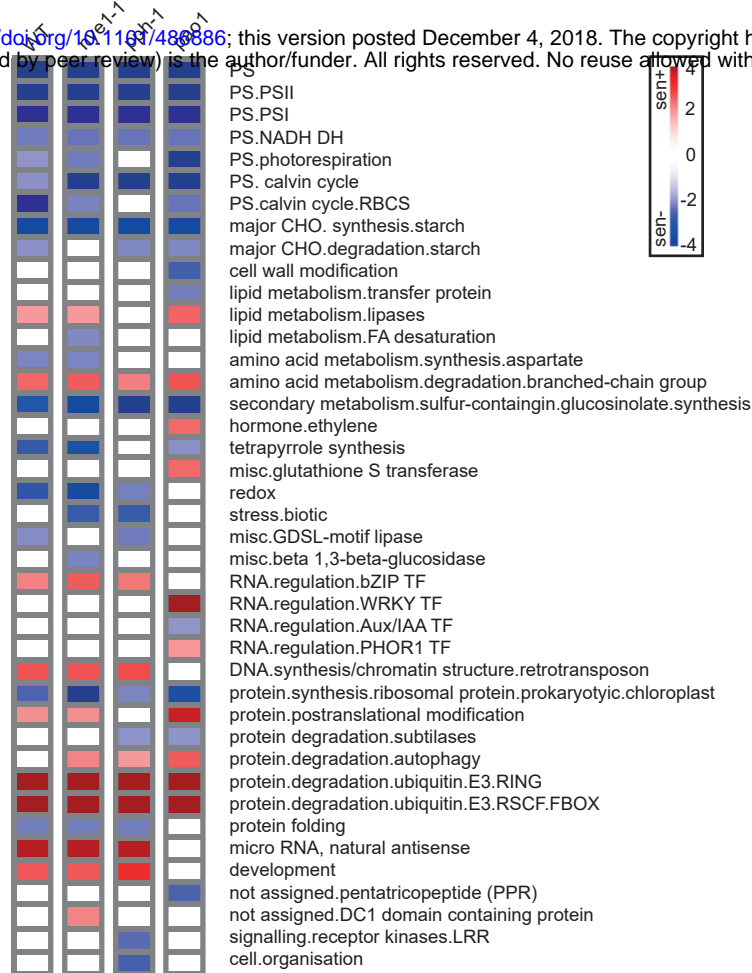**B**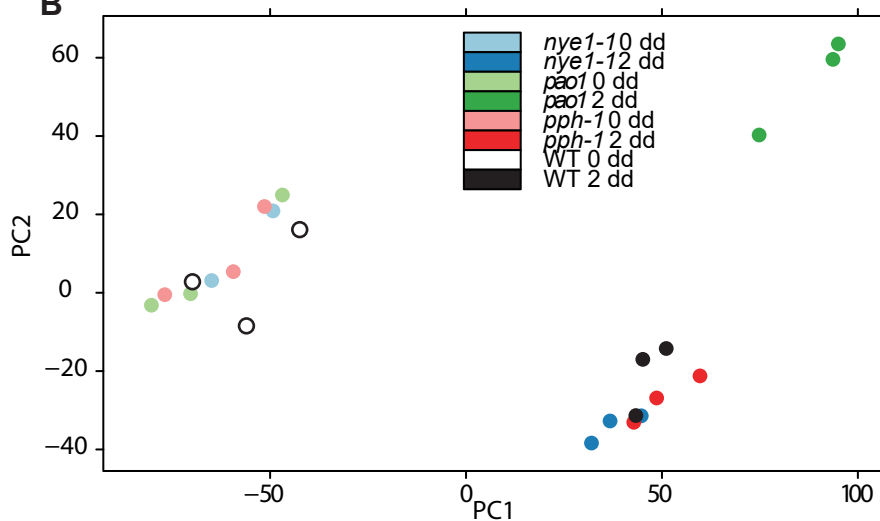**C**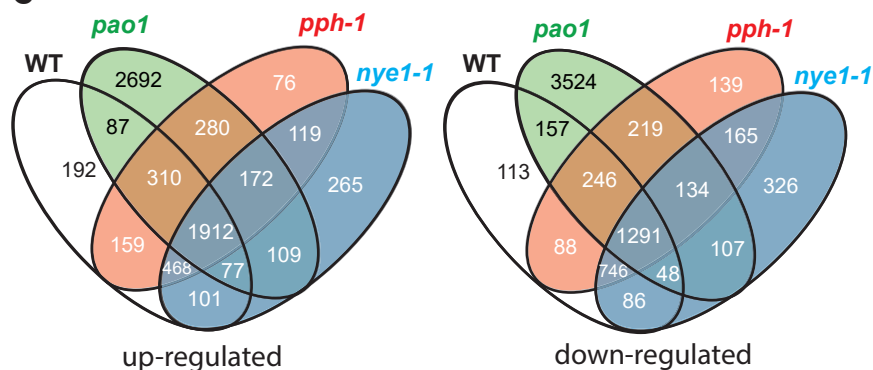

**Figure 2. RNAseq profiling of CCG mutants provide new insight into the relationship of the PAO/phyllobilin pathway to global leaf senescence.** **A** Major enriched gene ontology terms identified in the three CCG mutants during dark-induced senescence (0 dd vs 2 dd) using Wilcoxon test implemented in Pageman tool (Usadel et al., 2006). **B** Principal Component Analysis of the RNAseq data. **C** Venn diagrams showing common patterns of differential expression (0 dd vs 2 dd) of up- and down-regulated genes during dark-induced senescence.



### 0 dd vs 2 dd

bioRxiv preprint doi: <https://doi.org/10.1101/486886>; this version posted December 4, 2018. The copyright holder for this preprint (which was not certified by peer review) is the author/funder. All rights reserved. No reuse allowed without permission.

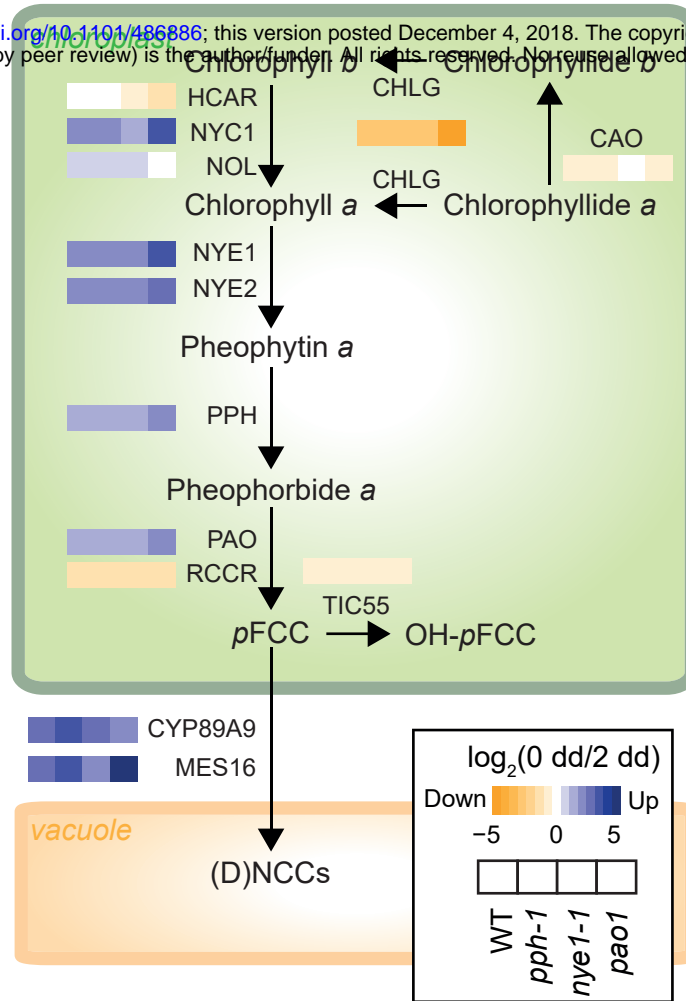

**Figure 3. Influence of dark-induced senescence on the expression of the genes involved in the PAO/phyllobilin pathway.** Heat maps represent log<sub>2</sub> (fold change) of gene expression in each of the four studied lines during dark-induced senescence. Genes/enzymes: CAO, chlorophyll *a* oxygenase; CHLG, chlorophyll synthase; CYP89A9, cytochrome P450 monooxygenase 89A9; HCAR, 7-hydroxymethyl chlorophyll *a* reductase; MES16, methylesterase 16; NYC1, non-yellow coloring 1 (chlorophyll *b* reductase); NYE1, non yellowing 1 (magnesium dechelate); NYE2, non yellowing 2; PAO, pheophorbide *a* oxygenase; PPH, pheophytinase; RCCR, RCC reductase; TIC55, translocon at the inner chloroplast envelope 55. Phyllobilins: DNCC, dioxobilin-type NCC; NCC, non-fluorescent chlorophyll catabolite; pFCC, primary fluorescent chlorophyll catabolite; RCC, red chlorophyll catabolite.

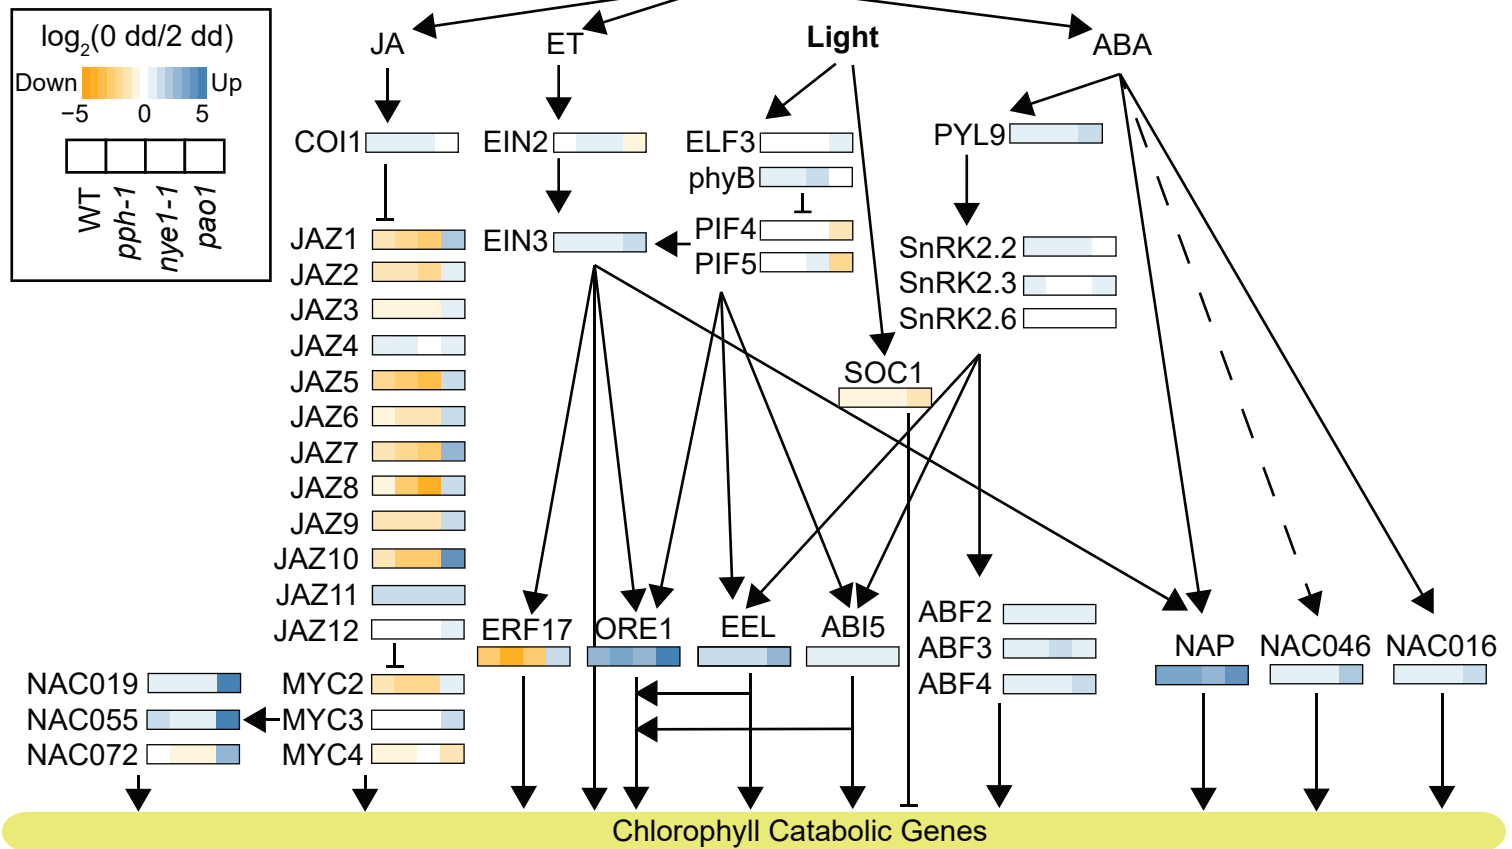

**Figure 4. Transcriptional regulation of the PAO/phyllobilin pathway during dark-induced senescence is mainly affected in *pao1*.** Heat maps represent log<sub>2</sub> (fold change) of gene expression in each of the four studied lines during dark-induced senescence. JA, jasmonic acid; ET, ethylene; ABA, abscisic acid; COI1, coronatine insensitive 1; JAZ, jasmonate-ZIM domain; NAC, NAM, ATAF1/2 and CUC2 domain protein; NAP, NAC-like, activated by PA3/PI; EIN, ethylene insensitive; ELF3, early flowering 3; PIF, phytochrome interacting factor; SOC1, suppressor of overexpression of *coi1*; ERF17, ethylene response factor; ORE1, oresara 1; EEL, enhance em level; ABI5, ABA insensitive 5; ABF, ABA-responsive element binding factor; SnRK2, serine/threonine kinase 2; PYL9, pyrabactin resistance 1-like 9.

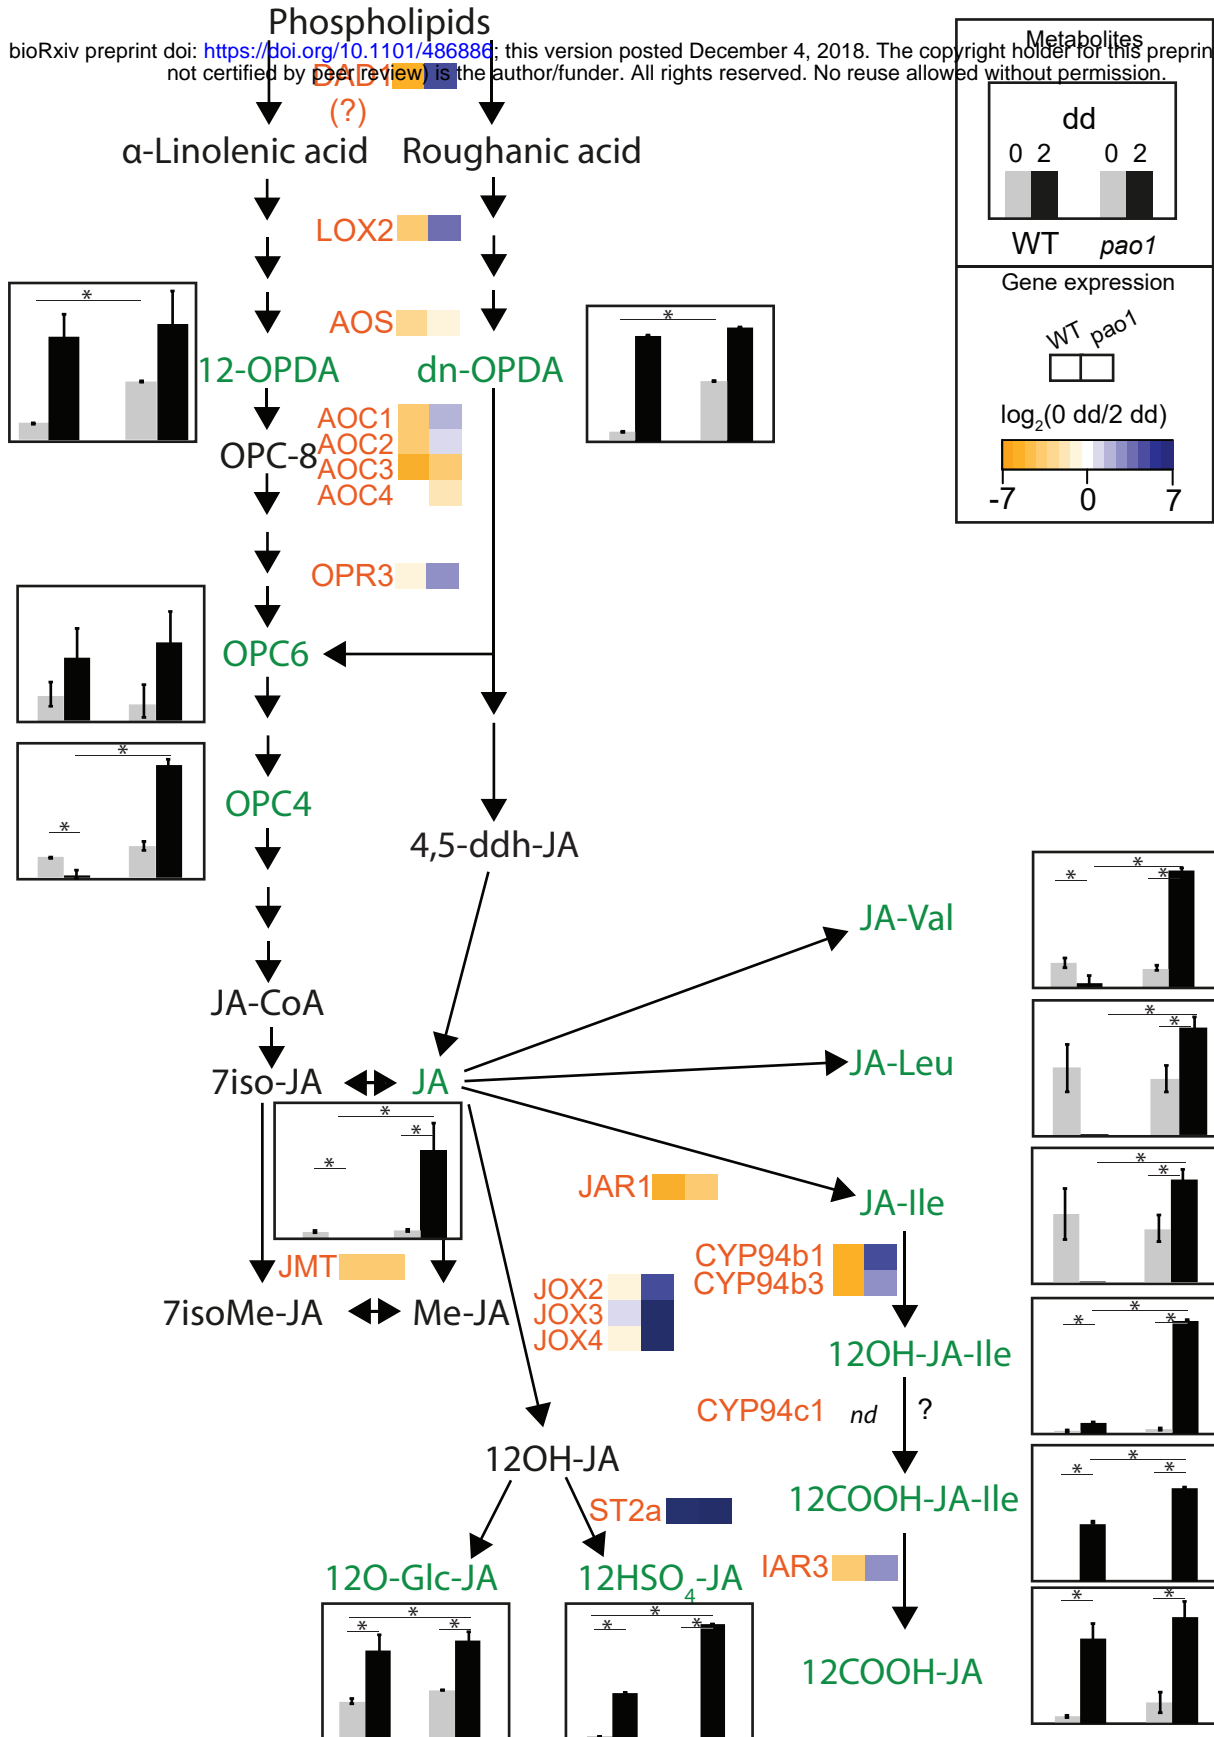

**Figure 5. Jasmonic acid metabolism during dark-induced senescence in WT and *pao1*.** Levels of JA and JA-related metabolites in grey (0 dd) and black (2 dd) for WT and *pao1* are shown as histograms. Expression levels are shown using heat maps of  $\log_2(\text{fold change})$ . Genes/enzymes: DAD1, delayed anther dehiscence 1; LOX2, 13-lipoxygenase 2; AOS, allene oxide synthase; AOC, allene oxide cyclase; OPR3, OPDA reductase 3; IAR3, IAA-alanine resistant 3; JMT, jasmonate methyltransferase; JAR1, JA-amino acid synthetase 1; JOX, JA-induced oxygenase; CYP, cytochrome P450 monooxygenase; ST2A, sulfotransferase 2. Metabolites: OPDA, 12-oxo-phytodienoic acid; OPC 3-oxo-2-cis-2-pentenyl cyclopentyl-octanoic acid; JA-CoA, jasmonate-coenzyme A. Asterisks indicate significant differences ( $p < 0.05$ ).



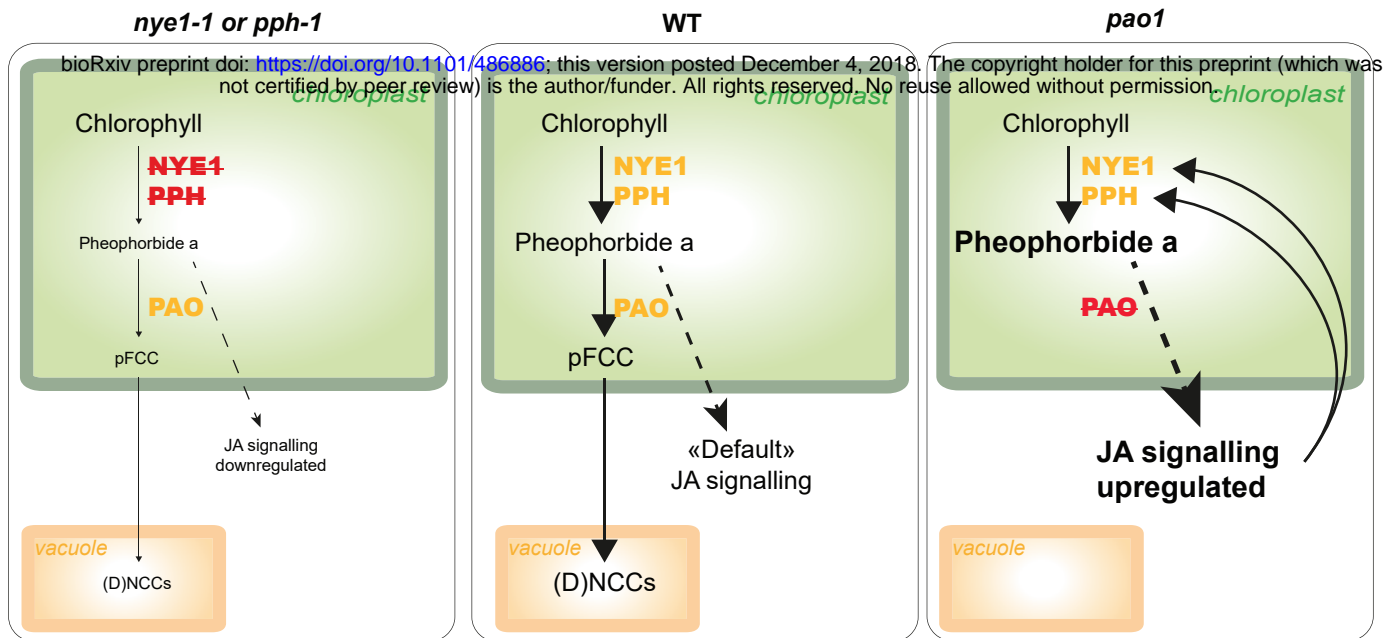

**Figure 7. Model illustrating the influence of pheophorbide  $\alpha$  homeostasis on JA signalling.** The middle panel shows the PAO/phyllobilin pathway under normal senescence conditions, leading to the complete degradation of chlorophyll to vacuole-localized phyllobilins. Left and right panels show modulation of catabolite homeostasis caused by mutations of either *nye1-1* or *pp1-1* (left panel) or *pao1* (right panel), and the respective observed downstream modulation of the JA response (hatched arrows). Arrow sizes schematically represent relative flux (metabolite) and response (JA signalling) intensities. Among the few genes differentially expressed in *nye1-1* and *pp1-1*, JAZ genes were downregulated compared to WT. On the other hand, in *pao1*, JA biosynthesis and signalling genes as well as some JA bioactive derivatives were induced.
